# Supplementary material for: Smoking, alcohol consumption, and 24 gastrointestinal diseases: Mendelian randomization analysis
Source: eLife. 2023 Feb 2;12:e84051. doi: 10.7554/eLife.84051 (PMC10017103; doi:10.7554/eLife.84051)
Supplement: Supplementary file 1. — (A) Information of included studies and consortia. (B) Definition of gastrointestinal diseases in UK Biobank and FinnGen. (C) Single nucleotide polymorphisms used as instrumental variables for smoking and alcohol consumption. (D) Power estimation of this Mendelian randomization analysis. (E) False discovery rate adjusted p values for all tested association. (F) Association of genetically-predicted smoke initiation with gastrointestinal disease in univaribale mendelian randomization. (G) Association of genetically-predicted smoking initiation (excluding 23andMe and UK Biobank), alcohol consumption (excluding 23andMe and UK Biobank) and lifetime smoking index with gastrointestinal disease in univariable mendelian randomization. (H) Association of genetically-predicted smoke initiation and alcohol consumption with gastrointestinal disease in multivaribale mendelian randomization. (I) Association of genetically-predicted alcohol consumption with gastrointestinal disease in univariable mendelian randomization. (J) Association of genetically-predicted alcohol consumption instrumented by rs1229984 in ADH1B with gastrointestinal diseases. (K) Evidence of causal association of smoking and drinking with 24 gastrointestinal diseases in the current study. (L) Association of genetically-predicted smoking initiation (excluding 23andMe and UK Biobank) with 24 gastrointestinal diseases. (M) Associations of genetically-predicted lifetime smoking with 24 gastrointestinal diseases. (N) Association of genetically-predicted alcohol consumption (excluding 23andMe and UK Biobank) with 24 gastrointestinal diseases. [file elife-84051-supp1.xlsx]

## Sheet: Index
	Smoking, Alcohol consumption, and 24 Gastrointestinal Diseases: Mendelian Randomization Analysis
	Shuai Yuan, Jie Chen, Xixian Ruan, Yuhao Sun, Ke Zhang, Xiaoyan Wang, Xue Li, Dipender Gill, Stephen Burgess, Edward L Giovannucci, Susanna C. Larsson
	Supplementary file 1A. Information of included studies and consortia
	Supplementary file 1B. Definition of gastrointestinal diseases in UK Biobank and FinnGen
	Supplementary file 1C. Single nucleotide polymorphisms used as instrumental variables for smoking and alcohol consumption
	Supplementary file 1D. Power estimation of this Mendelian randomization analysis
	Supplementary file 1E. False discovery rate adjusted p values for all tested associations
	Supplementary file 1F. Association of genetically-predicted smoke initiation with gastrointestinal disease in univaribale mendelian randomization
	Supplementary file 1G. Association of genetically-predicted smoking initiation (excluding 23andMe and UK Biobank), alcohol consumption (excluding 23andMe and UK Biobank) and lifetime smoking index with gastrointestinal disease in univariable mendelian randomization
	Supplementary file 1H. Association of genetically-predicted smoke initiation and alcohol consumption with gastrointestinal disease in multivaribale mendelian randomization
	Supplementary file 1I. Association of genetically-predicted alcohol consumption with gastrointestinal disease in univariable mendelian randomization
	Supplementary file 1J. Association of genetically-predicted alcohol consumption instrumented by rs1229984 in ADH1B with gastrointestinal diseases
	Supplementary file 1K. Evidence of causal association of smoking and drinking with 24 gastrointestinal diseases in the current study
	Supplementary file 1L. Association of genetically-predicted smoking initiation (excluding 23andMe and UK Biobank) with 24 gastrointestinal diseases
	Supplementary file 1M. Associations of genetically-predicted lifetime smoking with 24 gastrointestinal diseases
	Supplementary file 1N. Association of genetically-predicted alcohol consumption (excluding 23andMe and UK Biobank) with 24 gastrointestinal diseases

## Sheet: A
	Supplementary file 1A. Information of included studies and consortia.
		Consortium or cohort study	Participants	Web source/Pubmed ID
	Smoke initiation	GWAS and Sequencing Consortium of Alcohol and Nicotine use (GSCAN)	632,802 European-ancestry individuals	https://conservancy.umn.edu/handle/11299/201564
	Smoke index	The UK Biobank study	462,690 European-ancestry individuals	31689377
	Alcohol consumption	GWAS and Sequencing Consortium of Alcohol and Nicotine use (GSCAN)	941,280 European-ancestry individuals	https://conservancy.umn.edu/handle/11299/201564
	Gatrointestinal diseases	The Finngen study	-	https://www.finngen.fi/fi
	Gatrointestinal diseases	The UK Biobank study	-	https://www.leelabsg.org/resources
	Irritable bowel syndrome	Genetic Epidemiology Research on Aging (GERA)	3,117 European-ancestry cases and 53,520 European-ancestry controls	http://cg.bsc.es/gera_summary_stats/
	Crohn's disease	The International Inflammatory Bowel Disease Genetics Consortium (IIBDGC)	5,956 European-ancestry cases and 14,927 European-ancestry controls	26192919
	Ulcerative colitis	The International Inflammatory Bowel Disease Genetics Consortium (IIBDGC)	6,968 European-ancestry cases and 20,464 European-ancestry controls	26192919

## Sheet: B
	Supplementary file 1B. Definition of gastrointestinal diseases in UK Biobank and FinnGen
	Gastrointestinal diseases	UK Biobank				FinnGen
		Cases/Controls	ICD-9 codes	ICD-10 codes		Cases/Controls	ICD-8 codes	ICD-9 codes	ICD-10 codes
	Gastroesophageal reflux	14,223/369,275		K21, K21.9		19,912/265,354		5301A	K21
	Esophageal cancer	720/393,372	150, 150.5	C15.0, C15.1, C15.2, C15.3, C15.4, C15.5, C15.8, C15.9, D00.1		410/308,744	150	150	C15
	Gastric ulcer	4,109/401,525	531.1, 531.5, 531.7, 531.9	K25.1, K25.3, K25.5, K25.7, K25.9		4,542/265,354		531	K25
	Duodenal ulcer	3,002/401,525	532.1, 532.3, 532.5, 532.7, 532.9	K26.1, K26.3, K26.5, K26.7, K26.9		2,711/265,354		532	K26
	Acute gastritis	1,184/378,124	535	K29.0, K29.1		1,864/265,354	53500, 53501, 53502	535.0	K29.0, K29.1
	Chronic gastritis	370/378,124	535.1	K29.4		7,605/265,354	53503	535.1, 535.4	K29.3, K29.4, K29.5
	Gastric cancer	554/393,372	151.9	C16.0, C16.1, C16.2, C16.3, C16.4, C16.5, C16.6, C16.8, C16.9, D00.2		1,054/308,100	151	151	C16
	Irritable bowel syndrome	5,548/334,783	564.1	K58.0, K58.9		7,053/253,186	56419	564.1	K58
	Celiac disease	1,855/334,783	579.0, 579.1	K90.0, K90.1		2,953/296,917		5790A	K90.0
	Ulcerative colitis	27,311/334,783	556.9	K51.0, K51.1, K51.2, K51.3, K51.4, K51.5, K51.8, K51.9		22,754/253,186	5631, 569	556	K51
	Crohn's disease	1,743/334,783	555.0, 555.1, 555.2, 555.9	K50.0, K50.1, K50.8, K50.9		3,147/296,008	5630	555	K50
	Diverticular disease	3,195/334,783	562.0, 562.1	K57.0, K57.1, K57.2, K57.3, K57.4, K57.5, K57.8, K57.9		6,607/296,008	562	562	K57
	Colorectal cancer	4,562/382,756	153.0, 153.2, 153.3, 153.4, 153.6, 153.7, 153.9, 154.0, 154.1, 154.2, 154.3, 159.0	C18.0, C18.1, C18.2, C18.3, C18.4, C18.5, C18.6, C18.7, C18.8, C18.9, C19, C20, C21.0, C21.1, C21.8, C26.0, D01.0, D01.2, D01.3		4,957/304,197	153, 1540,1541	153, 154	C18, C19, C20
	Non-alcoholic fatty liver disease	1,664/400,055	571.5, 571.8, 571.9	K74.0, K74.1, K74.2, K76.0		1,578/307,576			K76.0
	Alcoholic liver disease	802/379,355	571.0, 571.1, 571.2, 571.3	K70.0, K70.1, K70.2, K70.3, K70.9		2,153/301,014	5710	571.0, 571.1, 571.2, 571.3	K70
	Cirrhosis	2,895/400,055	571.6	K74.3, K74.4, K74.5		3,009/306,145	5719	571.5, 571.6	K74
	Liver cancer	196/393,372	155.1	C22.0, C22.1, C22.2, C22.3, C22.4, C22.7, C22.9, D01.5		518/308,636	155	155	C22
	Cholangitis	477/391,307	576.1	K83.0		1,231/273,442	57504, 57505	576.1	K83.0
	Cholelithiasis	2,761/391,307	574.0, 574.1, 574.2	K80.0, K80.1, K80.2, K80.3, K80.4, K80.8		3,132/273,442	574	574	K80
	Chlocystitis	13,777/391,307	575.0, 575.1	K81.0, K81.1, K81.8, K81.9		28,733/273,442	57500,57501, 57502, 57503	575.0, 575.1	K81
	Acute pancreatitis	1,986/406,271	577	K85		4,648/273,442	5770	577.0	K85
	Chronic pancreatitis	514/406,271	577.1	K86.0, K86.1		2,659/273,442	5771	577.1	K86.0, K86.1
	Pancreatic cancer	589/393,372	157.0, 157.4, 157.9	C25.0, C25.1, C25.2, C25.3, C25.4, C25.7, C25.8, C25.9		1,054/308,100	157	157	C25
	Acute appendicitis	2,608/405,552	540.0, 540.1, 540.9	K35.0, K35.1, K35.9		22,753/284,597	540	540	K35
	ICD, International Classification of Diseases

## Sheet: C
	Supplementary file 1C. Single nucleotide polymorphisms used as instrumental variables for smoking and alcohol consumption
	Trait	SNP	Chr	Position	EA	NEA	EAF	Beta	SE	P value	F statistic
	Smoke initiation	rs12130857	1	7791461	A	G	0.324968	-0.0180031	0.00272026	3.65e-11	43.8
	Smoke initiation	rs301807	1	8484823	G	A	0.57	0.0180144	0.00257349	2.5e-12	49
	Smoke initiation	rs3820277	1	18436657	T	G	0.526	-0.0188369	0.00255159	1.57e-13	54.5
	Smoke initiation	rs1889571	1	32195819	G	T	0.131	0.0221798	0.00377614	4.19e-09	34.5
	Smoke initiation	rs10914684	1	33795572	A	G	0.324	-0.0158038	0.00272237	6.32e-09	33.7
	Smoke initiation	rs2637869	1	38757237	A	G	0.297	0.0182201	0.00278829	6.54e-11	42.7
	Smoke initiation	rs12755632	1	41776623	G	A	0.316	-0.0154051	0.00274045	1.93e-08	31.6
	Smoke initiation	rs951740	1	44011737	A	G	0.625	0.0295409	0.00263171	3.82e-29	126
	Smoke initiation	rs925524	1	46496709	G	A	0.71	0.0155573	0.0028078	2.94e-08	30.7
	Smoke initiation	rs12022778	1	50603995	C	A	0.202	0.0268248	0.00317904	3.18e-17	71.2
	Smoke initiation	rs4912332	1	58815243	T	C	0.491	0.0141209	0.00254855	2.94e-08	30.7
	Smoke initiation	rs1937443	1	66469643	G	C	0.563	0.0204362	0.00256861	1.79e-15	63.3
	Smoke initiation	rs12740789	1	72752073	A	G	0.178	-0.0284973	0.00333079	1.18e-17	73.2
	Smoke initiation	rs10789369	1	73824909	G	A	0.615	-0.0234484	0.00261834	3.39e-19	80.2
	Smoke initiation	rs1514176	1	74991596	A	G	0.58	-0.0193002	0.0025814	7.67e-14	55.9
	Smoke initiation	rs10873871	1	76689019	G	A	0.207	0.0174521	0.00314465	2.82e-08	30.8
	Smoke initiation	rs11162019	1	87913176	T	C	0.363	-0.0154947	0.00264954	5.06e-09	34.2
	Smoke initiation	rs1008078	1	91189731	T	C	0.402	0.0228169	0.00259854	1.63e-18	77.1
	Smoke initiation	rs12027999	1	154206358	C	T	0.12	-0.0243588	0.00392068	5.33e-10	38.6
	Smoke initiation	rs45444697	1	155034632	G	C	0.212	0.0196901	0.00311718	2.72e-10	39.9
	Smoke initiation	rs2901785	1	174104743	A	G	0.446	-0.0173083	0.00256313	1.47e-11	45.6
	Smoke initiation	rs147052174	1	179783167	T	G	0.0171	0.0623094	0.00982745	2.3e-10	40.2
	Smoke initiation	rs35656245	1	190957480	A	G	0.276	0.0159456	0.00285016	2.23e-08	31.3
	Smoke initiation	rs12739243	1	210302043	C	T	0.221	-0.0212518	0.00307064	4.45e-12	47.9
	Smoke initiation	rs12563365	1	236872829	A	G	0.556	0.0165589	0.00256428	1.05e-10	41.7
	Smoke initiation	rs876793	1	237852083	C	T	0.349262	-0.0179245	0.00273664	5.69e-11	42.9
	Smoke initiation	rs114976176	2	264621	C	A	0.351571	-0.0155137	0.00266843	6.04e-09	33.8
	Smoke initiation	rs62106258	2	417167	C	T	0.047329	-0.045498	0.0060001	3.33e-14	57.5
	Smoke initiation	rs6731872	2	624205	G	T	0.826	0.0315977	0.00336069	5.35e-21	88.4
	Smoke initiation	rs1022376	2	22067213	C	T	0.515821	-0.0147448	0.00261063	1.66e-08	31.9
	Smoke initiation	rs61533748	2	22582968	C	T	0.384	0.0174357	0.00261962	2.82e-11	44.3
	Smoke initiation	rs72790288	2	29513404	A	G	0.0282	-0.0455318	0.00769628	3.28e-09	35
	Smoke initiation	rs2710634	2	32808804	C	T	0.521	-0.0177614	0.00255039	3.36e-12	48.5
	Smoke initiation	rs62137126	2	44250149	G	A	0.121094	-0.0236911	0.00390536	1.31e-09	36.8
	Smoke initiation	rs1004787	2	45159091	A	G	0.552	0.0284143	0.00256204	1.11e-28	123
	Smoke initiation	rs7598402	2	50735943	G	C	0.492084	-0.0147283	0.00254846	7.38e-09	33.4
	Smoke initiation	rs10490159	2	51341259	T	C	0.394	0.0172365	0.00260741	3.86e-11	43.7
	Smoke initiation	rs1518393	2	58171220	C	A	0.619	0.0168601	0.00262353	1.3e-10	41.3
	Smoke initiation	rs17616642	2	59022210	G	A	0.24687	-0.0165573	0.00295478	2.1e-08	31.4
	Smoke initiation	rs2539706	2	59819545	A	G	0.529947	0.0162454	0.00255272	1.95e-10	40.5
	Smoke initiation	rs1863161	2	60139524	A	G	0.56094	0.0153394	0.00256728	2.34e-09	35.7
	Smoke initiation	rs359247	2	60477052	T	A	0.638652	0.0220304	0.00265215	9.89e-17	69
	Smoke initiation	rs62180324	2	63416606	A	G	0.212	-0.0195167	0.00311718	3.91e-10	39.2
	Smoke initiation	rs6750107	2	80748807	A	G	0.386875	0.0145651	0.00261598	2.6e-08	31
	Smoke initiation	rs12714017	2	80999398	C	T	0.511	0.0153965	0.00260995	3.65e-09	34.8
	Smoke initiation	rs56208390	2	83247997	G	A	0.123	0.0215636	0.00387919	2.68e-08	30.9
	Smoke initiation	rs11692435	2	98275354	A	G	0.0848	0.0250526	0.00458161	4.47e-08	29.9
	Smoke initiation	rs13392222	2	100672408	C	A	0.139	-0.0234375	0.00368286	1.93e-10	40.5
	Smoke initiation	rs1901477	2	104126983	G	A	0.511	0.030437	0.00260995	2.07e-31	136
	Smoke initiation	rs3811038	2	113240183	C	T	0.279	0.0191404	0.00284069	1.58e-11	45.4
	Smoke initiation	rs34399632	2	137571174	G	A	0.232	0.0193504	0.00301835	1.46e-10	41.1
	Smoke initiation	rs6756212	2	146140132	T	C	0.535	-0.033888	0.00255441	3.49e-40	176
	Smoke initiation	rs16826827	2	147825689	C	T	0.124	-0.0222069	0.00386572	9.17e-09	33
	Smoke initiation	rs1445649	2	155682556	C	T	0.538	0.0205716	0.00255553	8.48e-16	64.8
	Smoke initiation	rs12474587	2	162802993	T	G	0.429	0.0242306	0.00257423	4.83e-21	88.6
	Smoke initiation	rs357304	2	164862639	C	T	0.727	0.0166757	0.00285986	5.4e-09	34
	Smoke initiation	rs13007361	2	166250244	A	G	0.208	0.0175338	0.00313906	2.29e-08	31.2
	Smoke initiation	rs7600835	2	172521827	A	G	0.342	-0.0151216	0.00268576	1.8e-08	31.7
	Smoke initiation	rs6750529	2	182027603	T	C	0.744	0.0199074	0.00291936	9.26e-12	46.5
	Smoke initiation	rs17229285	2	199523122	T	C	0.505	-0.0154796	0.00254827	1.27e-09	36.9
	Smoke initiation	rs3115418	2	200936399	C	T	0.454	-0.0142249	0.00255899	2.79e-08	30.9
	Smoke initiation	rs62193862	2	202843875	A	G	0.0999	0.0238463	0.00424879	1.99e-08	31.5
	Smoke initiation	rs4674916	2	225365635	A	C	0.327671	-0.0180261	0.00271446	3.06e-11	44.1
	Smoke initiation	rs4674993	2	226332033	G	A	0.2	-0.0240053	0.00318518	4.85e-14	56.8
	Smoke initiation	rs11713899	3	2365026	C	A	0.171	0.0187188	0.00338391	3.15e-08	30.6
	Smoke initiation	rs748832	3	16851202	G	A	0.371	0.0172142	0.00263743	6.6e-11	42.6
	Smoke initiation	rs10446419	3	25725501	G	A	0.207	-0.0195626	0.00314465	5.05e-10	38.7
	Smoke initiation	rs3172494	3	48731487	T	G	0.115	-0.0291267	0.00400086	3.4e-13	53
	Smoke initiation	rs2526390	3	50192760	T	C	0.334	0.0204663	0.00270136	3.62e-14	57.4
	Smoke initiation	rs2276825	3	52886605	C	T	0.245	0.0188756	0.00296235	1.89e-10	40.6
	Smoke initiation	rs2306866	3	53766212	T	A	0.614	-0.0166755	0.00261707	1.89e-10	40.6
	Smoke initiation	rs73831818	3	55988394	G	A	0.057	0.0320435	0.00549541	5.46e-09	34
	Smoke initiation	rs7640107	3	59966156	T	C	0.430789	-0.014186	0.00257291	3.46e-08	30.4
	Smoke initiation	rs2734390	3	60459291	G	A	0.372	0.0147709	0.00263598	2.09e-08	31.4
	Smoke initiation	rs221988	3	64234307	C	A	0.384	-0.014865	0.00261962	1.43e-08	32.2
	Smoke initiation	rs11128203	3	71064431	A	T	0.53	0.020406	0.00255274	1.29e-15	63.9
	Smoke initiation	rs62246017	3	71483084	A	G	0.322639	-0.0161695	0.00272537	3.03e-09	35.2
	Smoke initiation	rs4543050	3	74954560	T	A	0.816	0.0222035	0.00328806	1.45e-11	45.6
	Smoke initiation	rs6782116	3	77176032	T	C	0.415	-0.0146502	0.00258578	1.46e-08	32.1
	Smoke initiation	rs13066050	3	81325861	T	C	0.208	0.0188343	0.00313906	1.93e-09	36
	Smoke initiation	rs12633090	3	83241365	C	G	0.182	-0.0230197	0.00330203	3.16e-12	48.6
	Smoke initiation	rs1549979	3	85460131	T	C	0.615	-0.0245223	0.00262304	8.8e-21	87.4
	Smoke initiation	rs6437769	3	107997514	T	C	0.581	0.0142141	0.00258225	3.74e-08	30.3
	Smoke initiation	rs9288999	3	114147927	A	G	0.735	0.0174411	0.00288687	1.5e-09	36.5
	Smoke initiation	rs6438436	3	117822149	T	C	0.816	0.024737	0.00328806	5.33e-14	56.6
	Smoke initiation	rs9826984	3	131945722	A	G	0.542	-0.0140529	0.00255718	3.87e-08	30.2
	Smoke initiation	rs2279829	3	147106319	T	C	0.216	-0.0173766	0.00309606	2.05e-08	31.5
	Smoke initiation	rs2319545	3	147719648	A	C	0.149099	0.0232366	0.00357698	8.3e-11	42.2
	Smoke initiation	rs10935779	3	149543102	T	C	0.415	-0.0143272	0.00258578	2.95e-08	30.7
	Smoke initiation	rs1714521	3	158284861	C	A	0.411	-0.0162953	0.00258949	3.07e-10	39.6
	Smoke initiation	rs1449012	3	159048333	T	C	0.463	-0.0153734	0.00255515	1.77e-09	36.2
	Smoke initiation	rs9850597	3	161761866	A	G	0.816	-0.018571	0.00328806	1.65e-08	31.9
	Smoke initiation	rs1187820	3	173072584	T	C	0.439	-0.0142712	0.00256732	2.69e-08	30.9
	Smoke initiation	rs16828799	3	173353739	T	G	0.156	0.0197692	0.00351124	1.83e-08	31.7
	Smoke initiation	rs9841807	3	175718927	T	C	0.273	0.0162535	0.00285986	1.35e-08	32.3
	Smoke initiation	rs7631379	3	181409057	C	T	0.206	0.0208014	0.00315028	3.94e-11	43.6
	Smoke initiation	rs4140932	4	15458598	A	T	0.431	-0.0140445	0.00257276	4.89e-08	29.8
	Smoke initiation	rs59537158	4	28246049	T	C	0.214	0.0224875	0.00310653	4.62e-13	52.4
	Smoke initiation	rs55944129	4	29082156	C	T	0.267	-0.0175654	0.00287996	1.06e-09	37.2
	Smoke initiation	rs58400863	4	31184484	A	G	0.347	-0.0201719	0.00267653	4.89e-14	56.8
	Smoke initiation	rs7657022	4	35501032	G	A	0.489	0.0182908	0.00254876	7.34e-13	51.5
	Smoke initiation	rs112725451	4	68017710	T	C	0.169	0.026092	0.00339977	1.65e-14	58.9
	Smoke initiation	rs1160685	4	94052854	G	C	0.45	0.0153017	0.00256098	2.31e-09	35.7
	Smoke initiation	rs1435479	4	94550450	T	G	0.28748	0.0163905	0.00281508	5.68e-09	33.9
	Smoke initiation	rs3934797	4	112467612	A	G	0.182	-0.0212975	0.00330203	1.12e-10	41.6
	Smoke initiation	rs71602617	4	136406155	T	C	0.216	-0.0177655	0.00317039	2.1e-08	31.4
	Smoke initiation	rs7696257	4	137474783	A	G	0.366	0.0153313	0.00264489	6.78e-09	33.6
	Smoke initiation	rs13109980	4	140886963	A	G	0.326	-0.0221816	0.00271803	3.37e-16	66.6
	Smoke initiation	rs1116690	4	143510148	G	A	0.742	0.0162912	0.00291194	2.16e-08	31.3
	Smoke initiation	rs13110073	4	147797913	C	T	0.395	-0.0246426	0.00260626	3.24e-21	89.4
	Smoke initiation	rs62340589	4	176875795	C	G	0.201	0.0174134	0.00317923	4.31e-08	30
	Smoke initiation	rs12517438	5	30842054	G	T	0.538	0.0153545	0.00255553	1.89e-09	36.1
	Smoke initiation	rs35375873	5	43190647	C	G	0.11	-0.0270102	0.00407195	3.29e-11	44
	Smoke initiation	rs986714	5	50821338	T	A	0.445	-0.0160308	0.0025637	4.13e-10	39.1
	Smoke initiation	rs71592686	5	60121271	C	T	0.274	0.0207374	0.0028566	3.85e-13	52.7
	Smoke initiation	rs2028269	5	79308315	A	G	0.399	0.0161645	0.00260178	5.19e-10	38.6
	Smoke initiation	rs6874731	5	80263865	G	T	0.484	0.0153179	0.00254945	1.83e-09	36.1
	Smoke initiation	rs6452785	5	87685500	T	C	0.474	-0.0268827	0.00255159	4.69e-26	111
	Smoke initiation	rs10805858	5	88873832	T	A	0.335286	0.0181241	0.00269879	1.88e-11	45.1
	Smoke initiation	rs42417	5	94198290	T	C	0.691	0.0169296	0.00275724	8.27e-10	37.7
	Smoke initiation	rs72780746	5	103929588	C	T	0.173	-0.025763	0.00336835	2.05e-14	58.5
	Smoke initiation	rs10060196	5	106455988	A	C	0.580606	0.0183116	0.00258191	1.29e-12	50.3
	Smoke initiation	rs72789626	5	106825618	A	T	0.136	-0.0256431	0.00371678	5.13e-12	47.6
	Smoke initiation	rs17165769	5	107365642	G	A	0.394872	0.0159396	0.0026064	9.56e-10	37.4
	Smoke initiation	rs329124	5	133865452	G	A	0.428	-0.0163871	0.00257498	1.96e-10	40.5
	Smoke initiation	rs1385108	5	154839646	T	C	0.239	0.0187045	0.00298746	3.84e-10	39.2
	Smoke initiation	rs1173461	5	157707571	T	C	0.327	0.0166092	0.00271589	9.51e-10	37.4
	Smoke initiation	rs11956866	5	161018271	G	T	0.567	-0.0148382	0.00257133	7.82e-09	33.3
	Smoke initiation	rs3909281	5	165096435	G	T	0.536	0.0210672	0.00255477	1.62e-16	68
	Smoke initiation	rs3843905	5	165427280	T	C	0.403	-0.0151458	0.00259749	5.41e-09	34
	Smoke initiation	rs6890961	5	166778503	T	C	0.624	-0.0193109	0.00263031	2.13e-13	53.9
	Smoke initiation	rs4044321	5	166989513	G	A	0.644	-0.022641	0.00266088	1.75e-17	72.4
	Smoke initiation	rs2173019	5	167614971	A	T	0.177	0.028207	0.00333816	2.98e-17	71.4
	Smoke initiation	rs10042827	5	170299916	C	T	0.681	0.0167171	0.00273354	9.41e-10	37.4
	Smoke initiation	rs359431	5	173288534	T	C	0.56	-0.0141982	0.00256669	3.16e-08	30.6
	Smoke initiation	rs1150668	6	28129789	G	T	0.419	-0.0185103	0.00258689	8.54e-13	51.2
	Smoke initiation	rs1632941	6	29796685	C	T	0.46	-0.0158074	0.00256093	6.67e-10	38.1
	Smoke initiation	rs3218116	6	41901763	T	C	0.256	-0.019843	0.00291936	1.05e-11	46.2
	Smoke initiation	rs160631	6	52895230	G	T	0.731	-0.0172628	0.00287315	1.87e-09	36.1
	Smoke initiation	rs7743165	6	67521222	G	T	0.495	0.0192559	0.00254827	4.15e-14	57.1
	Smoke initiation	rs10945141	6	69470709	A	G	0.263	0.0181417	0.00289389	3.59e-10	39.3
	Smoke initiation	rs17554906	6	92226609	C	G	0.444	0.0141849	0.00256428	3.14e-08	30.6
	Smoke initiation	rs619087	6	94175279	G	A	0.422	0.0142703	0.00257973	3.1e-08	30.6
	Smoke initiation	rs6568832	6	97702876	A	G	0.753851	0.018869	0.00295768	1.74e-10	40.7
	Smoke initiation	rs12195240	6	98636905	A	G	0.285	0.0249108	0.0028224	1.08e-18	77.9
	Smoke initiation	rs6936160	6	100347745	T	C	0.698	0.0201068	0.002775	4.2e-13	52.5
	Smoke initiation	rs3800227	6	108994161	G	A	0.742	0.017178	0.00291194	3.64e-09	34.8
	Smoke initiation	rs118202	6	111658371	T	G	0.812	-0.0367484	0.00326089	1.9e-29	127
	Smoke initiation	rs73008357	6	156431856	C	A	0.121	-0.0223095	0.00400046	2.44e-08	31.1
	Smoke initiation	rs9331343	6	157738258	C	T	0.568	-0.0141345	0.00257204	3.9e-08	30.2
	Smoke initiation	rs10698713	6	158882320	A	G	0.0544	-0.033517	0.00561747	2.38e-09	35.6
	Smoke initiation	rs1737329	6	163807748	G	C	0.742	0.0170292	0.00291194	5.08e-09	34.2
	Smoke initiation	rs6948707	7	1870794	G	T	0.419	0.0243472	0.00258225	4.24e-21	88.9
	Smoke initiation	rs13237637	7	3503207	C	G	0.485	-0.0236823	0.00254929	1.54e-20	86.3
	Smoke initiation	rs7809303	7	69484366	A	G	0.325	-0.0214188	0.0027202	3.48e-15	62
	Smoke initiation	rs7802996	7	77771983	T	C	0.166	-0.0208847	0.00342418	1.06e-09	37.2
	Smoke initiation	rs1030015	7	78139581	T	G	0.519564	0.0142896	0.00255009	2.15e-08	31.4
	Smoke initiation	rs4727189	7	88442568	C	T	0.344	0.0148604	0.00268202	3e-08	30.7
	Smoke initiation	rs76841737	7	91281409	G	C	0.103	-0.0231488	0.00419159	3.26e-08	30.5
	Smoke initiation	rs11768481	7	96629103	A	C	0.34	-0.0185561	0.00268957	5.23e-12	47.6
	Smoke initiation	rs1799068	7	97707069	T	G	0.379	0.0166096	0.0026262	2.59e-10	40
	Smoke initiation	rs13437771	7	99071478	G	A	0.155	-0.0271098	0.00352046	1.39e-14	59.3
	Smoke initiation	rs11766326	7	111100585	C	T	0.506	-0.017544	0.00260951	1.79e-11	45.2
	Smoke initiation	rs6968380	7	114940159	A	G	0.681	-0.0234192	0.00273354	1.05e-17	73.4
	Smoke initiation	rs10233018	7	117523709	G	A	0.516	0.0246124	0.00254945	4.77e-22	93.2
	Smoke initiation	rs10953957	7	121954709	A	G	0.386	0.0144058	0.00261707	3.66e-08	30.3
	Smoke initiation	rs77283305	7	132593831	A	G	0.305819	-0.015196	0.00276519	3.91e-08	30.2
	Smoke initiation	rs10279261	7	133589846	A	G	0.618	-0.0188726	0.00262221	6.05e-13	51.8
	Smoke initiation	rs4326350	8	10763655	G	C	0.493	-0.0176137	0.00255297	5.16e-12	47.6
	Smoke initiation	rs11783093	8	27425349	T	C	0.158	-0.0471243	0.00349308	2.07e-41	182
	Smoke initiation	rs7836565	8	52569449	T	C	0.718	-0.0155084	0.00283144	4.36e-08	30
	Smoke initiation	rs13261666	8	59814666	T	G	0.517	-0.0199946	0.00254962	4.36e-15	61.5
	Smoke initiation	rs3850736	8	64912021	G	C	0.474	0.0191284	0.00255159	6.43e-14	56.2
	Smoke initiation	rs2063976	8	91096366	T	C	0.664955	-0.0201814	0.00269927	7.45e-14	55.9
	Smoke initiation	rs6986430	8	93048104	C	T	0.222377	-0.0243377	0.00306383	1.99e-15	63.1
	Smoke initiation	rs9987376	8	93190014	G	T	0.574251	-0.0204682	0.00257671	2.01e-15	63.1
	Smoke initiation	rs290601	8	115374642	T	C	0.274	0.0163102	0.0028566	1.14e-08	32.6
	Smoke initiation	rs3847244	9	3025368	T	C	0.47	0.0186717	0.00255274	2.6e-13	53.5
	Smoke initiation	rs11791671	9	3398679	T	C	0.067315	0.0278504	0.00508476	4.24e-08	30
	Smoke initiation	rs7024924	9	8282399	C	T	0.174	0.0188918	0.00336069	1.9e-08	31.6
	Smoke initiation	rs1931431	9	11161799	C	G	0.478	0.0182329	0.00255061	8.56e-13	51.1
	Smoke initiation	rs7867822	9	20676454	G	A	0.673	-0.015097	0.00271589	2.76e-08	30.9
	Smoke initiation	rs10966092	9	23831658	C	T	0.267	-0.0204862	0.00287996	1.12e-12	50.6
	Smoke initiation	rs10969352	9	29747488	A	T	0.5	0.0143467	0.00254814	1.82e-08	31.7
	Smoke initiation	rs4877285	9	81354129	A	G	0.668249	-0.0181318	0.00270594	2.1e-11	44.9
	Smoke initiation	rs1930371	9	81444104	T	C	0.241	-0.017242	0.00297896	7.09e-09	33.5
	Smoke initiation	rs2378662	9	86707289	A	G	0.541	0.0152121	0.00255675	2.67e-09	35.4
	Smoke initiation	rs1927901	9	120519111	C	T	0.553	-0.0141755	0.00256258	3.1e-08	30.6
	Smoke initiation	rs4837631	9	122061948	T	C	0.446	-0.0153574	0.00256313	2.03e-09	35.9
	Smoke initiation	rs1759433	9	128073097	A	G	0.48	0.0153647	0.00255018	1.69e-09	36.3
	Smoke initiation	rs34553878	9	134334588	G	A	0.111	0.0246707	0.00405584	1.17e-09	37
	Smoke initiation	rs7026534	9	134907263	G	T	0.703821	-0.016603	0.00279052	2.68e-09	35.4
	Smoke initiation	rs10858334	9	137989785	G	C	0.14	0.022871	0.00375997	1.18e-09	37
	Smoke initiation	rs10905461	10	8803551	C	T	0.748	-0.0163915	0.00293456	2.36e-08	31.2
	Smoke initiation	rs7920501	10	10043159	A	T	0.465	-0.0155168	0.00255441	1.25e-09	36.9
	Smoke initiation	rs1291821	10	11133823	G	A	0.534	0.014493	0.00255405	1.39e-08	32.2
	Smoke initiation	rs11258417	10	13533053	T	C	0.391	-0.0145136	0.00261094	2.71e-08	30.9
	Smoke initiation	rs7072776	10	22032942	G	A	0.712	-0.0219747	0.00281357	5.66e-15	61
	Smoke initiation	rs2796793	10	36634124	A	G	0.452	0.0144814	0.00255997	1.55e-08	32
	Smoke initiation	rs1733760	10	56698174	C	T	0.51	0.0147734	0.00254865	6.7e-09	33.6
	Smoke initiation	rs7921378	10	63674885	C	G	0.482	-0.0233135	0.00254979	6.1e-20	83.6
	Smoke initiation	rs11594623	10	103960351	C	T	0.234241	0.0274396	0.00300827	7.45e-20	83.2
	Smoke initiation	rs28408682	10	104403310	G	A	0.600019	0.0166729	0.00260071	1.41e-10	41.1
	Smoke initiation	rs12244388	10	104640052	A	G	0.35	0.0258153	0.00267118	4.31e-22	93.4
	Smoke initiation	rs11192347	10	106929313	A	G	0.104	-0.02645	0.00427392	6.15e-10	38.3
	Smoke initiation	rs10885480	10	115378364	C	T	0.284	-0.0186775	0.00282539	3.83e-11	43.7
	Smoke initiation	rs4752018	10	118678712	A	C	0.231	0.0188538	0.0030229	4.42e-10	38.9
	Smoke initiation	rs9423279	10	125680419	G	C	0.645	-0.0185808	0.00266256	3.06e-12	48.7
	Smoke initiation	rs6265	11	27679916	T	C	0.188	-0.0292755	0.00326089	2.81e-19	80.6
	Smoke initiation	rs62618693	11	32956492	T	C	0.0428	-0.0352724	0.00629463	2.09e-08	31.4
	Smoke initiation	rs2939756	11	41436297	A	G	0.48	-0.0156997	0.00255018	7.45e-10	37.9
	Smoke initiation	rs1381775	11	42442826	C	T	0.712	-0.0156147	0.00281357	2.79e-08	30.8
	Smoke initiation	rs2959084	11	46078656	A	G	0.704674	0.0170799	0.00279286	9.82e-10	37.4
	Smoke initiation	rs3740977	11	46393574	C	T	0.167	0.019474	0.00341596	1.17e-08	32.5
	Smoke initiation	rs61886926	11	64133552	T	C	0.384	-0.0179401	0.00261962	7.3e-12	46.9
	Smoke initiation	rs61884449	11	64485193	T	C	0.149183	0.0199753	0.00357615	2.32e-08	31.2
	Smoke initiation	rs644740	11	65561468	T	C	0.457	-0.0140785	0.00255762	3.67e-08	30.3
	Smoke initiation	rs7943721	11	73309393	A	G	0.829	-0.0212136	0.00338391	3.58e-10	39.3
	Smoke initiation	rs7929518	11	85980958	G	A	0.773	0.0192363	0.00304152	2.55e-10	40
	Smoke initiation	rs586699	11	92289734	A	G	0.543	-0.0148033	0.00255762	7.29e-09	33.5
	Smoke initiation	rs76460663	11	111979741	G	C	0.041056	-0.04235	0.00642109	4.15e-11	43.5
	Smoke initiation	rs2155646	11	112912811	C	T	0.4	0.0377772	0.00260069	9.44e-48	211
	Smoke initiation	rs1713676	11	113660576	G	A	0.522512	-0.0167262	0.00255073	5.38e-11	43
	Smoke initiation	rs238896	11	113994505	A	G	0.49	-0.0168674	0.00254865	3.65e-11	43.8
	Smoke initiation	rs540860	11	121530888	G	A	0.543	0.0176086	0.00255762	5.75e-12	47.4
	Smoke initiation	rs1106363	11	131966264	T	C	0.344579	0.0173746	0.00268095	9.2e-11	42
	Smoke initiation	rs2010921	11	132098205	A	G	0.311	0.0174291	0.00275235	2.47e-10	40.1
	Smoke initiation	rs11057005	12	16748721	G	A	0.441	-0.0157139	0.00256607	9.12e-10	37.5
	Smoke initiation	rs13906	12	49952394	T	C	0.109	-0.0245297	0.00408829	1.98e-09	36
	Smoke initiation	rs4759229	12	56474480	G	A	0.656	0.0155696	0.00268202	6.53e-09	33.7
	Smoke initiation	rs7969559	12	69655167	G	A	0.713	-0.0170159	0.00281649	1.53e-09	36.5
	Smoke initiation	rs7134009	12	75263193	C	T	0.287	-0.0157969	0.00288411	4.3e-08	30
	Smoke initiation	rs77215829	12	112618346	C	A	0.131	-0.0240447	0.00378293	2.02e-10	40.4
	Smoke initiation	rs1109480	12	121083279	A	G	0.384	-0.0166917	0.00261962	1.84e-10	40.6
	Smoke initiation	rs11611651	12	133380790	A	G	0.0868	0.0271143	0.00452534	2.05e-09	35.9
	Smoke initiation	rs17197663	13	38172867	A	G	0.125	-0.0215874	0.00385243	2.06e-08	31.4
	Smoke initiation	rs4264267	13	38359676	T	C	0.527042	0.0147921	0.00255188	6.82e-09	33.6
	Smoke initiation	rs61959481	13	55834929	A	G	0.21	-0.0203442	0.00312803	7.95e-11	42.3
	Smoke initiation	rs9538162	13	59265043	C	T	0.415874	0.0173792	0.00258499	1.76e-11	45.2
	Smoke initiation	rs55786907	13	59871584	G	A	0.162492	0.0194452	0.00345369	1.84e-08	31.7
	Smoke initiation	rs4886207	13	60705792	C	T	0.637	-0.0162467	0.00264954	8.78e-10	37.6
	Smoke initiation	rs9540731	13	66949370	T	C	0.509	-0.0177303	0.00254855	3.42e-12	48.4
	Smoke initiation	rs9545155	13	80191873	C	T	0.478	-0.0160709	0.00255061	3.04e-10	39.7
	Smoke initiation	rs1772572	13	81191176	A	C	0.324132	-0.0168681	0.00272209	5.62e-10	38.4
	Smoke initiation	rs75674569	13	96823724	A	G	0.0997	-0.0253377	0.00425258	2.58e-09	35.5
	Smoke initiation	rs7333559	13	100546450	A	G	0.783	-0.0232125	0.00309089	5.94e-14	56.4
	Smoke initiation	rs1108130	13	100648356	A	T	0.212	0.0239436	0.00311718	1.57e-14	59
	Smoke initiation	rs12855717	13	101252635	T	C	0.538	0.0155237	0.00255553	1.22e-09	36.9
	Smoke initiation	rs12878369	14	28346502	A	C	0.414762	0.0174373	0.00258792	1.6e-11	45.4
	Smoke initiation	rs9323328	14	58653514	G	A	0.537	-0.014237	0.00255705	2.55e-08	31
	Smoke initiation	rs1811739	14	77529375	A	G	0.248	0.0182718	0.00295244	5.97e-10	38.3
	Smoke initiation	rs8005334	14	79563654	G	T	0.36	0.0166734	0.00265629	3.44e-10	39.4
	Smoke initiation	rs34940743	14	80102233	G	A	0.346	0.0159249	0.00268034	2.8e-09	35.3
	Smoke initiation	rs2925128	14	98362355	T	C	0.385191	0.0168199	0.00268304	3.67e-10	39.3
	Smoke initiation	rs1381287	14	98597552	T	C	0.467	0.0180166	0.00255561	1.81e-12	49.7
	Smoke initiation	rs55913542	14	99693843	T	G	0.175	0.0185623	0.0033556	3.25e-08	30.6
	Smoke initiation	rs1435672	15	36399479	C	T	0.56	0.0141051	0.00256669	3.82e-08	30.2
	Smoke initiation	rs281296	15	47685010	A	G	0.357	0.0246892	0.00265922	1.59e-20	86.2
	Smoke initiation	rs56902655	15	63898709	G	T	0.136	-0.0218628	0.00371678	4.09e-09	34.6
	Smoke initiation	rs2289791	15	67476952	T	G	0.247	-0.0177255	0.00295425	2.01e-09	36
	Smoke initiation	rs60833441	15	74048768	G	A	0.461	-0.0142766	0.00255593	2.28e-08	31.2
	Smoke initiation	rs62007780	15	78025464	T	G	0.416	-0.0159133	0.00258488	7.48e-10	37.9
	Smoke initiation	rs4310804	15	96858409	G	C	0.247	-0.0181873	0.00295425	7.55e-10	37.9
	Smoke initiation	rs8027457	15	99204101	C	T	0.511	0.0153138	0.00254876	1.88e-09	36.1
	Smoke initiation	rs1139897	16	720986	A	G	0.23	-0.0240872	0.0030275	1.77e-15	63.3
	Smoke initiation	rs11076962	16	5811367	C	T	0.279	0.0182999	0.00284069	1.2e-10	41.5
	Smoke initiation	rs7192140	16	10173748	C	T	0.498	-0.0168834	0.00254816	3.4e-11	43.9
	Smoke initiation	rs9922607	16	17570220	T	C	0.2	-0.0221593	0.00318518	3.42e-12	48.4
	Smoke initiation	rs9941217	16	18050926	G	C	0.352204	-0.0185567	0.00266733	3.5e-12	48.4
	Smoke initiation	rs7188873	16	24727064	G	A	0.612998	0.0202958	0.00261582	8.46e-15	60.2
	Smoke initiation	rs6497840	16	25351633	A	G	0.707	0.0227703	0.00286651	2.01e-15	63.1
	Smoke initiation	rs4785187	16	49766772	A	G	0.223	0.0199772	0.00306077	6.55e-11	42.6
	Smoke initiation	rs8050598	16	49891964	T	C	0.254117	0.0186698	0.00292645	1.76e-10	40.7
	Smoke initiation	rs12918191	16	50945156	G	A	0.243	-0.019727	0.00297059	3.14e-11	44.1
	Smoke initiation	rs9302604	16	69576894	G	A	0.435	0.0187095	0.00256995	3.29e-13	53
	Smoke initiation	rs62052916	16	72574550	T	A	0.0701	-0.0319138	0.00499018	1.62e-10	40.9
	Smoke initiation	rs4788676	16	72950468	C	T	0.228528	-0.017745	0.00303434	4.92e-09	34.2
	Smoke initiation	rs117657830	16	75766873	G	A	0.0417	-0.0377597	0.00637345	3.18e-09	35.1
	Smoke initiation	rs1050847	16	87443734	T	C	0.559	-0.01483	0.00256607	7.37e-09	33.4
	Smoke initiation	rs11642231	16	89608702	A	G	0.369	-0.0155983	0.00264038	3.44e-09	34.9
	Smoke initiation	rs4790874	17	1995177	T	C	0.532	0.0174491	0.00255338	8.43e-12	46.7
	Smoke initiation	rs28441558	17	7803118	C	T	0.0563	-0.035565	0.00552742	1.24e-10	41.4
	Smoke initiation	rs11651955	17	16235462	A	G	0.499	-0.0140264	0.00254815	3.74e-08	30.3
	Smoke initiation	rs67777803	17	27323322	T	G	0.172	-0.0246015	0.00337609	3.18e-13	53.1
	Smoke initiation	rs2344976	17	30685935	C	T	0.612	-0.0150877	0.00261458	7.98e-09	33.3
	Smoke initiation	rs17692129	17	44793283	T	C	0.331	0.0195989	0.00270749	4.57e-13	52.4
	Smoke initiation	rs75919030	17	50193197	C	T	0.267	-0.0209664	0.00287996	3.35e-13	53
	Smoke initiation	rs2587507	17	77790135	C	T	0.502	-0.0146602	0.00254816	8.69e-09	33.1
	Smoke initiation	rs34342129	18	5872472	C	T	0.509	-0.014281	0.00254855	2.13e-08	31.4
	Smoke initiation	rs4476253	18	25253297	A	G	0.24	-0.0184862	0.00298319	5.78e-10	38.4
	Smoke initiation	rs7505855	18	31696075	T	C	0.586	-0.0169818	0.00258669	5.31e-11	43.1
	Smoke initiation	rs8096225	18	36921851	C	A	0.703	0.0155245	0.00278829	2.63e-08	31
	Smoke initiation	rs67050670	18	39297254	G	A	0.229	-0.0202723	0.00303214	2.34e-11	44.7
	Smoke initiation	rs2359180	18	41314171	G	A	0.369	-0.0143894	0.00264038	4.98e-08	29.7
	Smoke initiation	rs72898831	18	42658643	G	A	0.155	-0.0244159	0.00352046	4.14e-12	48.1
	Smoke initiation	rs1373178	18	49967811	G	T	0.588	-0.0203164	0.00258855	4.16e-15	61.6
	Smoke initiation	rs62098013	18	50863861	A	G	0.365322	0.01771	0.00264593	2.24e-11	44.8
	Smoke initiation	rs72938304	18	53661743	A	G	0.113	-0.0272051	0.00402432	1.36e-11	45.7
	Smoke initiation	rs11872397	18	72535282	A	G	0.253	-0.0171139	0.00293071	5.2e-09	34.1
	Smoke initiation	rs71367544	18	77574374	T	C	0.203	0.0205522	0.0031675	8.54e-11	42.1
	Smoke initiation	rs76608582	19	4474725	A	C	0.0489	-0.0345493	0.0059078	4.88e-09	34.2
	Smoke initiation	rs10853981	19	4965064	A	G	0.33036	0.0147872	0.00270881	4.88e-08	29.8
	Smoke initiation	rs113230003	19	18460956	A	G	0.255	-0.0188761	0.00292311	1.05e-10	41.7
	Smoke initiation	rs8103660	19	18566395	C	T	0.354431	0.0158026	0.00266352	3.03e-09	35.2
	Smoke initiation	rs117734003	19	51129745	C	G	0.0673	0.0302991	0.00508528	2.57e-09	35.5
	Smoke initiation	rs1126757	19	55879872	T	C	0.473	0.0141623	0.00255187	2.92e-08	30.8
	Smoke initiation	rs6050446	20	25195509	G	A	0.971	0.0544098	0.00761144	8.8e-13	51.1
	Smoke initiation	rs6073075	20	42015801	A	T	0.824	-0.018704	0.00335394	2.44e-08	31.1
	Smoke initiation	rs910912	20	54462393	C	T	0.739	-0.0167699	0.00290609	7.82e-09	33.3
	Smoke initiation	rs6011779	20	61984317	T	C	0.806	-0.0191766	0.00322763	2.83e-09	35.3
	Smoke initiation	rs3810496	20	62406886	C	T	0.619436	0.0158813	0.00262869	1.54e-09	36.5
	Smoke initiation	rs4818005	21	40588819	A	G	0.581	-0.020431	0.00264425	1.09e-14	59.7
	Smoke initiation	rs4822102	22	42698430	T	C	0.618	-0.0165428	0.00262221	2.78e-10	39.8
	Smoke initiation	rs9627272	22	46442288	C	G	0.407	-0.0154737	0.0025934	2.42e-09	35.6
	Smoke index	rs11210229	1	73860028	A	G	0.384	0.017	0.002	2e-16	72.25
	Smoke index	rs549845	1	44076469	G	A	0.301	0.016	0.002	8.3e-14	64
	Smoke index	rs10922907	1	91193049	A	T	0.451	0.015	0.002	3e-13	56.25
	Smoke index	rs7553348	1	75005067	G	A	0.438	0.014	0.002	5.2e-12	49
	Smoke index	rs7528604	1	66407352	G	A	0.566	0.014	0.002	5.7e-12	49
	Smoke index	rs1933270	1	49977965	T	G	0.364	0.013	0.002	1.5e-10	42.25
	Smoke index	rs7519626	1	99514554	C	T	0.324	0.012	0.002	1.2e-08	36
	Smoke index	rs9435340	1	107593201	T	A	0.344	0.012	0.002	1.2e-08	36
	Smoke index	rs4949465	1	32178489	T	C	0.87	-0.017	0.003	1.7e-08	32.1111
	Smoke index	rs10918701	1	162090536	G	A	0.372	0.012	0.002	2.1e-08	36
	Smoke index	rs1193237	1	7526486	G	C	0.439	-0.011	0.002	2.8e-08	30.25
	Smoke index	rs1931263	1	96175101	G	T	0.51	-0.011	0.002	4e-08	30.25
	Smoke index	rs2890772	2	146175106	G	T	0.413	-0.02	0.002	2.1e-22	100
	Smoke index	rs62155874	2	105973094	A	G	0.873	-0.024	0.003	5.2e-16	64
	Smoke index	rs2867112	2	651349	T	G	0.835	0.021	0.003	4.8e-15	49
	Smoke index	rs7569203	2	45154418	A	C	0.689	-0.016	0.002	7.4e-13	64
	Smoke index	rs12623702	2	202885506	A	G	0.613	-0.014	0.002	7.7e-12	49
	Smoke index	rs4671357	2	60136176	T	C	0.519	-0.014	0.002	1.1e-11	49
	Smoke index	rs4473348	2	182073742	A	T	0.25	-0.015	0.002	6.4e-11	56.25
	Smoke index	rs2678670	2	104469564	A	T	0.486	0.013	0.002	3.1e-10	42.25
	Smoke index	rs62135536	2	44326028	C	T	0.968	0.035	0.006	8e-10	34.0278
	Smoke index	rs3811038	2	113240183	T	C	0.724	-0.014	0.002	8.9e-10	49
	Smoke index	rs359243	2	60475509	T	C	0.393	-0.013	0.002	9.5e-10	42.25
	Smoke index	rs13016665	2	57995348	C	A	0.577	-0.012	0.002	1.8e-09	36
	Smoke index	rs3769949	2	166199284	T	A	0.528	-0.012	0.002	2.5e-09	36
	Smoke index	rs13009008	2	174043233	A	G	0.328	0.012	0.002	4.6e-09	36
	Smoke index	rs6741228	2	22548774	T	C	0.433	0.011	0.002	1.6e-08	30.25
	Smoke index	rs62175972	2	161362830	T	C	0.966	0.031	0.006	1.7e-08	26.6944
	Smoke index	rs6778080	3	49317338	T	C	0.267	0.016	0.002	1.3e-12	64
	Smoke index	rs326341	3	107811142	G	A	0.525	0.014	0.002	1.2e-11	49
	Smoke index	rs421983	3	84892866	T	C	0.519	0.013	0.002	3.3e-10	42.25
	Smoke index	rs6779302	3	16859710	G	T	0.633	-0.013	0.002	1.2e-09	42.25
	Smoke index	rs9842947	3	157412246	C	T	0.326	-0.013	0.002	3.1e-09	42.25
	Smoke index	rs775758	3	77582005	A	T	0.433	0.012	0.002	1.1e-08	36
	Smoke index	rs73220544	3	131074511	A	C	0.842	-0.016	0.003	1.5e-08	28.4444
	Smoke index	rs17576594	4	147952241	G	A	0.724	0.016	0.002	1.7e-12	64
	Smoke index	rs72678864	4	112422145	G	A	0.829	0.018	0.003	1.6e-11	36
	Smoke index	rs317021	4	35418368	T	A	0.814	-0.017	0.003	1.1e-10	32.1111
	Smoke index	rs624833	4	2881256	T	G	0.695	0.013	0.002	6.6e-10	42.25
	Smoke index	rs61796681	4	23678196	A	T	0.912	-0.019	0.004	4.2e-08	22.5625
	Smoke index	rs986391	5	166993972	G	A	0.367	0.016	0.002	9.4e-15	64
	Smoke index	rs329120	5	133861756	C	T	0.581	0.014	0.002	6.3e-12	49
	Smoke index	rs13153393	5	167604213	A	G	0.884	-0.02	0.003	2.5e-10	44.4444
	Smoke index	rs11948770	5	13246336	T	C	0.768	-0.015	0.002	4.9e-10	56.25
	Smoke index	rs71627581	5	43161351	G	A	0.889	0.019	0.003	1.6e-09	40.1111
	Smoke index	rs10052591	5	50812738	T	C	0.573	0.012	0.002	2.1e-09	36
	Smoke index	rs4957528	5	106420589	A	C	0.208	-0.015	0.002	4.2e-09	56.25
	Smoke index	rs245774	5	170530930	A	G	0.272	-0.013	0.002	7.4e-09	42.25
	Smoke index	rs4571506	5	87756918	C	T	0.54	0.011	0.002	1.5e-08	30.25
	Smoke index	rs2080870	5	60388313	A	T	0.258	0.012	0.002	4.9e-08	36
	Smoke index	rs7766610	6	111707821	C	A	0.183	0.018	0.003	2.2e-12	36
	Smoke index	rs6935954	6	26255451	A	G	0.421	0.014	0.002	8.2e-12	49
	Smoke index	rs12202536	6	67475273	A	G	0.513	-0.012	0.002	2.8e-09	36
	Smoke index	rs2894808	6	52861990	T	A	0.922	-0.022	0.004	3.5e-09	30.25
	Smoke index	rs2254710	6	37477000	C	A	0.236	0.013	0.002	3.5e-08	42.25
	Smoke index	rs10226228	7	32315613	A	G	0.63	-0.016	0.002	2e-15	64
	Smoke index	rs2401924	7	115057862	G	C	0.502	0.015	0.002	2.7e-14	56.25
	Smoke index	rs7807019	7	117543063	A	G	0.54	-0.015	0.002	6.7e-14	56.25
	Smoke index	rs1922018	7	3560401	C	T	0.364	0.014	0.002	3e-12	49
	Smoke index	rs10282292	7	111092478	C	T	0.362	0.013	0.002	5.9e-10	42.25
	Smoke index	rs11768481	7	96629103	C	A	0.666	0.013	0.002	9.9e-10	42.25
	Smoke index	rs6962772	7	99081730	A	G	0.846	0.016	0.003	7.8e-09	28.4444
	Smoke index	rs4731925	7	132664757	C	T	0.316	-0.012	0.002	2.6e-08	36
	Smoke index	rs6957896	7	132309592	C	T	0.503	-0.011	0.002	4.5e-08	30.25
	Smoke index	rs11783093	8	27425349	C	T	0.839	0.023	0.003	1.2e-16	58.7778
	Smoke index	rs35169606	8	9604066	T	G	0.612	0.013	0.002	1.2e-09	42.25
	Smoke index	rs2062882	8	91839576	G	A	0.587	-0.012	0.002	1.1e-08	36
	Smoke index	rs72674867	8	95578201	A	T	0.765	0.013	0.002	3.8e-08	42.25
	Smoke index	rs113382419	9	136463019	C	A	0.889	-0.041	0.003	3e-37	186.778
	Smoke index	rs13296519	9	128471924	G	T	0.606	-0.014	0.002	8.1e-12	49
	Smoke index	rs1221148	9	122046875	C	G	0.587	0.013	0.002	7.3e-11	42.25
	Smoke index	rs4543592	9	3014254	T	C	0.52	-0.012	0.002	4.5e-10	36
	Smoke index	rs7039819	9	82430418	G	A	0.427	0.013	0.002	5.1e-10	42.25
	Smoke index	rs1246265	9	86761745	T	C	0.305	-0.013	0.002	4.2e-09	42.25
	Smoke index	rs12244388	10	104640052	G	A	0.661	-0.019	0.002	1.4e-19	90.25
	Smoke index	rs3896224	10	106467853	A	G	0.585	0.014	0.002	1.1e-11	49
	Smoke index	rs11255908	10	8802912	T	G	0.743	-0.015	0.002	2.3e-10	56.25
	Smoke index	rs2675638	10	63576286	G	A	0.581	0.012	0.002	1.3e-09	36
	Smoke index	rs7077678	10	104438565	C	T	0.623	0.012	0.002	2.6e-09	36
	Smoke index	rs17553262	10	92912773	A	C	0.885	-0.018	0.003	5.3e-09	36
	Smoke index	rs10823968	10	74738269	A	T	0.633	0.012	0.002	2.1e-08	36
	Smoke index	rs9919670	11	112877304	G	A	0.612	-0.022	0.002	7.6e-27	121
	Smoke index	rs17309874	11	27667236	G	A	0.74	-0.016	0.002	9.7e-13	64
	Smoke index	rs4391802	11	28674592	A	G	0.707	0.015	0.002	1.4e-11	56.25
	Smoke index	rs112282219	11	46632809	G	A	0.959	-0.033	0.005	3.8e-11	43.56
	Smoke index	rs75742406	11	17070365	G	A	0.739	0.014	0.002	1.3e-09	49
	Smoke index	rs34866095	11	16377356	A	G	0.686	-0.012	0.002	1.2e-08	36
	Smoke index	rs10879871	12	75380511	T	G	0.343	-0.014	0.002	5e-11	49
	Smoke index	rs7297175	12	56473808	T	C	0.431	-0.012	0.002	6.6e-09	36
	Smoke index	rs12831617	12	84758368	C	T	0.764	-0.013	0.002	1.9e-08	42.25
	Smoke index	rs74086911	12	50015942	G	A	0.925	0.021	0.004	2.1e-08	27.5625
	Smoke index	rs7333559	13	100546450	G	A	0.212	0.015	0.002	3.2e-10	56.25
	Smoke index	rs6562474	13	67332812	C	G	0.651	0.012	0.002	1e-08	36
	Smoke index	rs3742365	14	104198251	T	C	0.595	-0.016	0.002	2.5e-14	64
	Smoke index	rs7155595	14	77502546	A	C	0.674	-0.013	0.002	2.5e-09	42.25
	Smoke index	rs860326	14	57342912	C	T	0.428	0.012	0.002	2.7e-09	36
	Smoke index	rs35175834	15	47680815	G	A	0.788	-0.024	0.002	4.6e-22	144
	Smoke index	rs8042134	15	97514404	T	G	0.541	-0.014	0.002	1.3e-12	49
	Smoke index	rs6598539	15	99204483	T	C	0.489	-0.012	0.002	4.5e-09	36
	Smoke index	rs28485305	15	74044197	C	T	0.631	0.012	0.002	2.6e-08	36
	Smoke index	rs8042849	15	78817929	T	C	0.342	0.028	0.002	1.8e-39	196
	Smoke index	rs889398	16	69556715	C	T	0.588	0.013	0.002	6.3e-11	42.25
	Smoke index	rs369230	16	89645437	G	T	0.308	-0.013	0.002	1.8e-09	42.25
	Smoke index	rs12708665	16	24728227	A	G	0.285	-0.013	0.002	3.5e-09	42.25
	Smoke index	rs1050847	16	87443734	C	T	0.426	0.011	0.002	1.4e-08	30.25
	Smoke index	rs11861214	16	746611	G	T	0.784	0.014	0.002	2e-08	49
	Smoke index	rs60952428	16	75640521	T	C	0.909	0.019	0.003	3e-08	40.1111
	Smoke index	rs57611503	16	31165795	G	A	0.485	0.011	0.002	4e-08	30.25
	Smoke index	rs8614	17	27588806	C	A	0.817	-0.017	0.003	1.8e-10	32.1111
	Smoke index	rs67596067	17	50333733	G	A	0.649	-0.013	0.002	1.2e-09	42.25
	Smoke index	rs732083	17	37834367	G	A	0.333	0.012	0.002	1.5e-08	36
	Smoke index	rs9904288	17	47031973	T	C	0.708	0.012	0.002	3.1e-08	36
	Smoke index	rs71367545	18	77576337	G	A	0.791	-0.015	0.002	1.4e-09	56.25
	Smoke index	rs62098013	18	50863861	G	A	0.64	-0.012	0.002	4.1e-09	36
	Smoke index	rs12967855	18	35138245	A	G	0.331	0.012	0.002	3.1e-08	36
	Smoke index	rs76608582	19	4474725	C	A	0.953	0.031	0.005	3.2e-10	38.44
	Smoke index	rs35343344	19	18471610	C	A	0.733	0.013	0.002	8.8e-09	42.25
	Smoke index	rs6011779	20	61984317	C	T	0.191	0.028	0.003	2.3e-27	87.1111
	Smoke index	rs6119897	20	31145415	G	A	0.762	-0.018	0.002	3.6e-15	81
	Smoke index	rs4814873	20	19616429	C	T	0.767	0.014	0.002	2.9e-09	49
	Smoke index	rs12481282	20	44761377	G	C	0.722	-0.013	0.002	7.8e-09	42.25
	Smoke index	rs348809	20	59032097	A	G	0.348	-0.012	0.002	1.3e-08	36
	Smoke index	rs2838834	21	46665208	C	T	0.699	-0.013	0.002	6.3e-10	42.25
	Smoke index	rs147412694	21	40702786	G	A	0.85	-0.017	0.003	2.9e-09	32.1111
	Smoke index	rs202645	22	41798520	A	G	0.203	-0.015	0.002	3.9e-09	56.25
	Smoke index	rs136233	22	31212410	A	G	0.809	-0.014	0.003	1.8e-08	21.7778
	Alcohol consumption	rs705687	1	4548453	G	A	0.785	-0.010904	0.00177589	8.15e-10	37.7
	Alcohol consumption	rs58107686	1	33837334	A	C	0.328	-0.00974713	0.00158537	7.79e-10	37.8
	Alcohol consumption	rs12088813	1	66407700	C	A	0.267	-0.00932905	0.00164916	1.58e-08	32
	Alcohol consumption	rs5024204	1	71491890	T	A	0.278	0.00970271	0.00162847	2.55e-09	35.5
	Alcohol consumption	rs10753661	1	165119792	A	G	0.684	-0.00863813	0.00156927	3.76e-08	30.3
	Alcohol consumption	rs28680958	1	173848808	A	G	0.217	-0.0109965	0.00176994	5.13e-10	38.6
	Alcohol consumption	rs823114	1	205719532	A	G	0.553	0.00876774	0.00146742	2.31e-09	35.7
	Alcohol consumption	rs77165542	2	430975	T	C	0.0349	-0.0260109	0.00397124	5.63e-11	42.9
	Alcohol consumption	rs1260326	2	27730940	C	T	0.601	0.0208898	0.00148834	8.05e-45	197
	Alcohol consumption	rs13383034	2	45155276	T	C	0.329	0.014927	0.0015512	6.31e-22	92.6
	Alcohol consumption	rs13032049	2	63581507	G	A	0.283	0.0101946	0.00161798	3e-10	39.7
	Alcohol consumption	rs828867	2	74334462	A	G	0.545	0.00875716	0.0014636	2.15e-09	35.8
	Alcohol consumption	rs11692435	2	98275354	A	G	0.0852	0.0174499	0.00261585	2.53e-11	44.5
	Alcohol consumption	rs13024996	2	144225215	A	C	0.364	-0.0109126	0.00151477	5.72e-13	51.9
	Alcohol consumption	rs72859280	2	147956293	T	G	0.0362	0.0228853	0.00390192	4.44e-09	34.4
	Alcohol consumption	rs56337305	2	225475560	C	T	0.383	-0.00958838	0.00149928	1.63e-10	40.9
	Alcohol consumption	rs13094887	3	70968431	T	A	0.301	-0.0103097	0.00158893	8.57e-11	42.1
	Alcohol consumption	rs62250685	3	85457240	G	A	0.614	-0.0143571	0.00150009	1.05e-21	91.6
	Alcohol consumption	rs13066454	3	93994255	T	C	0.398	-0.00877595	0.00149196	4.13e-09	34.6
	Alcohol consumption	rs9838144	3	131576287	C	G	0.209	-0.00996422	0.00179252	2.65e-08	30.9
	Alcohol consumption	rs2011092	3	141124607	C	T	0.338643	-0.00890041	0.00154006	7.35e-09	33.4
	Alcohol consumption	rs6787172	3	158187811	G	T	0.554	-0.00803089	0.00146623	4.27e-08	30
	Alcohol consumption	rs3748034	4	3446091	T	G	0.143	-0.0117403	0.00208194	1.67e-08	31.8
	Alcohol consumption	rs11940694	4	39414993	G	A	0.597	0.0259499	0.00148589	3.03e-68	305
	Alcohol consumption	rs4501255	4	42151306	G	C	0.235	0.0106934	0.00171894	4.83e-10	38.7
	Alcohol consumption	rs1229984	4	100239319	C	T	0.963	0.150534	0.00386111	0	1520
	Alcohol consumption	rs36052336	4	100273594	G	A	0.061496	-0.0184288	0.00303378	1.23e-09	36.9
	Alcohol consumption	rs2165670	4	100286085	A	G	0.106337	0.0230804	0.00236427	1.67e-22	95.3
	Alcohol consumption	rs79139602	4	100444363	T	A	0.021061	0.0602723	0.00507584	1.8e-32	141
	Alcohol consumption	rs4699791	4	101243023	A	G	0.095726	0.0185707	0.0024772	6.58e-14	56.2
	Alcohol consumption	rs13107325	4	103188709	T	C	0.0722	-0.0275045	0.00281598	1.53e-22	95.4
	Alcohol consumption	rs4690727	4	143648579	G	C	0.718	0.010817	0.00161972	2.43e-11	44.6
	Alcohol consumption	rs12651313	4	171086393	G	C	0.443	-0.00864293	0.00146722	3.79e-09	34.7
	Alcohol consumption	rs4916723	5	87854395	C	A	0.416	-0.00995226	0.00147867	1.72e-11	45.3
	Alcohol consumption	rs12655091	5	144412335	A	G	0.53	-0.00831211	0.00146029	1.25e-08	32.4
	Alcohol consumption	rs55872084	5	155902003	T	G	0.235	0.00997874	0.00171894	6.32e-09	33.7
	Alcohol consumption	rs6460047	7	73042443	C	T	0.208	0.0116235	0.00179569	9.69e-11	41.9
	Alcohol consumption	rs10236149	7	98977515	G	A	0.123	-0.0134981	0.00221908	1.18e-09	37
	Alcohol consumption	rs35034355	7	103840115	A	G	0.521	-0.00809682	0.00145894	2.87e-08	30.8
	Alcohol consumption	rs6951574	7	153489744	C	T	0.458	0.0132222	0.00146283	1.58e-19	81.7
	Alcohol consumption	rs13250583	8	20949917	T	C	0.213	-0.00971754	0.00178012	4.7e-08	29.8
	Alcohol consumption	rs1217091	8	64527399	C	T	0.812	0.0121608	0.00186539	7.05e-11	42.5
	Alcohol consumption	rs28601761	8	126500031	G	C	0.42	0.00910288	0.00147668	7.17e-10	38
	Alcohol consumption	rs55932213	9	108755622	G	A	0.736387	0.00948827	0.0016542	9.55e-09	32.9
	Alcohol consumption	rs10978550	9	109345993	C	T	0.206	-0.0117483	0.00180211	7.15e-11	42.5
	Alcohol consumption	rs7074871	10	110507806	A	G	0.255	-0.00939985	0.00167216	1.86e-08	31.6
	Alcohol consumption	rs17665139	10	125093880	T	C	0.149	-0.0115601	0.00204676	1.59e-08	31.9
	Alcohol consumption	rs7950166	11	8642218	T	C	0.637	-0.0097992	0.00151566	9.89e-11	41.8
	Alcohol consumption	rs11030084	11	27643725	T	C	0.184	-0.0106068	0.00188093	1.72e-08	31.8
	Alcohol consumption	rs56030824	11	47397353	A	G	0.322	-0.0116019	0.00156298	1.15e-13	55.1
	Alcohol consumption	rs10750025	11	113424042	T	C	0.686	0.0103214	0.00157036	4.89e-11	43.2
	Alcohol consumption	rs1713676	11	113660576	G	A	0.522454	-0.00799198	0.00145913	4.29e-08	30
	Alcohol consumption	rs4938230	11	116075001	A	C	0.842	0.0128104	0.00199821	1.48e-10	41.1
	Alcohol consumption	rs682011	11	121544285	C	T	0.559	0.00821245	0.00146791	2.22e-08	31.3
	Alcohol consumption	rs12795042	11	133658168	C	A	0.623	-0.00831901	0.00150387	3.25e-08	30.6
	Alcohol consumption	rs10876188	12	51895882	T	C	0.457	-0.00798685	0.00146308	4.84e-08	29.8
	Alcohol consumption	rs3809162	12	54674235	G	A	0.397	0.00906092	0.00148961	1.19e-09	37
	Alcohol consumption	rs10506274	12	81601464	T	G	0.484	-0.0090374	0.00145841	5.78e-10	38.4
	Alcohol consumption	rs4842786	12	92170791	A	G	0.584	-0.0087978	0.00147867	2.73e-09	35.4
	Alcohol consumption	rs500321	13	27124360	T	A	0.736	-0.00966936	0.00165343	4.92e-09	34.2
	Alcohol consumption	rs1123285	14	57274519	G	C	0.335	-0.00889737	0.00154416	8.14e-09	33.2
	Alcohol consumption	rs2180870	14	58782779	C	T	0.135	-0.0121775	0.0021328	1.12e-08	32.6
	Alcohol consumption	rs28929474	14	94844947	T	C	0.0183	-0.0367996	0.00543764	1.34e-11	45.8
	Alcohol consumption	rs11625650	14	104610138	A	G	0.233	-0.00956809	0.00172405	2.89e-08	30.8
	Alcohol consumption	rs2472297	15	75027880	T	C	0.249	0.010606	0.00168541	3.1e-10	39.6
	Alcohol consumption	rs12907323	15	86796012	G	A	0.411	0.0084966	0.00148131	9.93e-09	32.9
	Alcohol consumption	rs2764771	16	20013793	A	G	0.307	0.0098906	0.00158174	4.02e-10	39.1
	Alcohol consumption	rs17177078	16	24810681	T	C	0.0626	-0.0223155	0.00301176	1.27e-13	54.9
	Alcohol consumption	rs378421	16	28754684	A	G	0.404	-0.0112055	0.00148681	4.83e-14	56.8
	Alcohol consumption	rs113443718	16	29892184	A	G	0.305	-0.0102083	0.00158463	1.19e-10	41.5
	Alcohol consumption	rs62044525	16	64872590	G	C	0.184	-0.0121732	0.00188285	1.03e-10	41.8
	Alcohol consumption	rs7185555	16	69131281	C	G	0.153	-0.0111005	0.00202667	4.24e-08	30
	Alcohol consumption	rs79616692	16	72338507	C	G	0.108	0.0163023	0.00235058	4.11e-12	48.1
	Alcohol consumption	rs1104608	16	73912588	C	G	0.425	-0.010975	0.00147585	1.05e-13	55.3
	Alcohol consumption	rs4548913	17	2209888	A	G	0.632	-0.00835995	0.00151127	3.11e-08	30.6
	Alcohol consumption	rs3803800	17	7462969	G	A	0.786	0.0113789	0.00177708	1.5e-10	41
	Alcohol consumption	rs2854334	17	29715500	G	A	0.615	0.00922098	0.00149781	7.51e-10	37.9
	Alcohol consumption	rs2532276	17	44246624	A	C	0.215	-0.0218001	0.00255853	1.62e-17	72.6
	Alcohol consumption	rs10438820	17	78524597	T	C	0.702	0.00897178	0.00159349	1.76e-08	31.7
	Alcohol consumption	rs9950000	18	53052169	T	C	0.395	-0.0091177	0.0014909	9.38e-10	37.4
	Alcohol consumption	rs4092465	18	55080437	G	A	0.635	-0.00829188	0.00151388	4.39e-08	30
	Alcohol consumption	rs281379	19	49214274	A	G	0.508	0.0137223	0.00145784	4.91e-21	88.6001
	Alcohol consumption	rs4815364	20	25035711	A	G	0.616	0.00858236	0.00149854	1.02e-08	32.8
	Alcohol consumption	rs9607814	22	41946519	A	C	0.2	-0.010181	0.00185879	4.31e-08	30
	Chr, chromosome; EA, effect allele; EAF, effect allele frequency; NEA, non-effect allele; SE, standard error.

## Sheet: D
	Supplementary file 1D. Power estimation of this Mendelian randomization analysis*
	Disease	Total cases	Total controls	OR with 80% power in analysis of smoke initiation	OR with 80% power in analysis of smoke index	OR with 80% power in analysis of alcohol consumption
	Gastroesophageal reflux	34135	634629	1.08	1.16	1.22
	Esophageal cancer	1130	702116	1.4	1.81	2.1
	Gastric ulcer	8651	666879	1.15	1.31	1.42
	Duodenal ulcer	5713	666879	1.18	1.38	1.51
	Acute gastritis	3048	643478	1.25	1.51	1.69
	Chronic gastritis	7975	643478	1.16	1.33	1.45
	Gastric cancer	1608	701472	1.34	1.71	1.96
	Irritable bowel syndrome	15718	641489	1.11	1.22	1.31
	Celiac disease	4808	631700	1.2	1.42	1.56
	Diverticular disease	50065	587969	1.07	1.14	1.18
	Crohn's disease	10846	645718	1.13	1.27	1.37
	Ulcerative colitis	16770	651255	1.1	1.21	1.3
	Colorectal cancer	9519	686953	1.14	1.29	1.39
	Non-alcoholic fatty liver disease	3242	707631	1.25	1.51	1.69
	Alcoholic liver disease	2955	680369	1.26	1.53	1.72
	Cirrhosis	5904	706200	1.22	1.46	1.62
	Liver cancer	714	702008	1.51	2.06	2.44
	Cholangitis	1708	664749	1.34	1.71	1.96
	Cholecystitis	5893	664749	1.18	1.38	1.51
	Cholelithiasis	42510	664749	1.07	1.15	1.2
	Acute pancreatitis	6634	679713	1.18	1.38	1.51
	Chronic pancreatitis	3173	679713	1.25	1.51	1.69
	Pancreatic cancer	1643	701472	1.34	1.71	1.96
	Acute appendicitis	25361	690149	1.09	1.19	1.26
	* Explained variance for smoke initiation, lifetime smoking, alcohol comsuptionwere 4.7%, 1.1%, and 0.6% respectively. Explained variance for each exposure were calculated based on previous published paper using the formula of R^2= (2× β^2×MAF×(1-MAF))assuming no genetic interactions, where β and EAF denote the effect estimate and the effect allele frequency of the allele on a standardized phenot…

## Sheet: E
	Supplementary file 1E. False discovery rate adjusted p values for all tested associations
	Disease	Smoke initiation									Alcohol comsuption
		Univarible Mendelian randomization				Multivarible Mendelian randomization					Univarible Mendelian randomization				Multivarible Mendelian randomization
		Original P value	Benjamini-Hochberg adjusted P value	Significant using an FDR of 0.05?		Original P value	Benjamini-Hochberg adjusted P value	Significant using an FDR of 0.05?			Original P value	Benjamini-Hochberg adjusted P value	Significant using an FDR of 0.05?		Original P value	Benjamini-Hochberg adjusted P value	Significant using an FDR of 0.05?
	Gastroesophageal reflux	4.09e-14	4.908e-13	Yes		1.38e-06	3.312e-05	Yes			0.892939	0.974182	No		0.219248	0.478255	No
	Esophageal cancer	0.000684089	0.001026	Yes		0.000197	0.0009456	Yes			0.0198664	0.08	No		0.532689	0.752047	No
	Gastric ulcer	3.83e-14	9.192e-13	Yes		7.31e-05	0.0004386	Yes			0.0976815	0.261333	No		0.720643	0.823543	No
	Duodenal ulcer	8.47e-10	4.0656e-09	Yes		0.024	0.0576	No			0.00422753	0.024	Yes		0.045137	0.18056	No
	Acute gastritis	0.00331645	0.00442667	Yes		0.106	0.149647	No			0.960354	0.96	No		0.620533	0.7446	No
	Chronic gastritis	1.55e-06	3.72e-06	Yes		0.091	0.1365	No			0.14744	0.294	No		0.115057	0.306933	No
	Gastric cancer	0.0027906	0.00393882	Yes		0.02	0.0533333	No			0.233193	0.399429	No		0.194325	0.46632	No
	Irritable bowel syndrome	3.5e-06	7.63636e-06	Yes		0.008	0.0274286	Yes			0.0118193	0.0576	No		0.0270721	0.129936	No
	Celiac disease	0.071	0.0809143	No		0.637	0.694909	No			0.097	0.291	No		0.569755	0.759733	No
	Diverticular disease	5.23e-14	4.184e-13	Yes		1.41e-06	1.692e-05	Yes			0.553111	0.8295	No		0.526502	0.78975	No
	Crohn's disease	0.000303343	0.0004848	Yes		0.042	0.0672	No			0.612534	0.817333	No		0.0884572	0.303291	No
	Ulcerative colitis	0.00376291	0.00474947	Yes		0.677	0.706435	No			0.508787	0.8144	No		0.358227	0.7164	No
	Colorectal cancer	0.632283	0.689455	No		0.841	0.841	No			0.649303	0.819789	No		0.0983815	0.29514	No
	Non-alcoholic fatty liver disease	3.82e-06	7.64e-06	Yes		0.016	0.048	Yes			0.573774	0.810353	No		0.961506	0.9615	No
	Alcoholic liver disease	1.49e-12	8.94e-12	Yes		0.006	0.024	Yes			6.32e-17	1.5168e-15	Yes		1.25e-13	3e-12	Yes
	Cirrhosis	3.39e-08	1.017e-07	Yes		0.032	0.064	No			0.00176262	0.016	Yes		0.00595437	0.047632	Yes
	Liver cancer	0.00741921	0.008904	Yes		0.183	0.244	No			0.774723	0.93	No		0.584863	0.738821	No
	Cholangitis	0.892664	0.931826	No		0.489	0.558857	No			0.911718	0.951652	No		0.39687	0.732738	No
	Cholecystitis	4.71e-09	1.884e-08	Yes		4.14e-05	0.0003312	Yes			0.132205	0.288	No		0.862483	0.9	No
	Cholelithiasis	5.75e-09	1.97143e-08	Yes		0.035	0.06	No			0.87847	1	No		0.80113	0.873927	No
	Acute pancreatitis	6.71e-08	1.78933e-07	Yes		0.031	0.0676364	No			0.127914	0.3072	No		0.455551	0.781029	No
	Chronic pancreatitis	0.00017945	0.000306857	Yes		0.384	0.4608	No			2.13e-05	0.0002556	Yes		3.18e-05	0.0003816	Yes
	Pancreatic cancer	0.998883	0.999	No		0.034	0.0627692	No			0.193133	0.356308	No		0.495687	0.79312	No
	Acute appendicitis	1.27e-05	2.34462e-05	Yes		0.221	0.279158	No			0.0626319	0.216	No		0.0244363	0.14664	No

## Sheet: F
	Supplementary file 1F. Association of genetically-predicted smoke initiation with gastrointestinal disease in univaribale Mendelian randomization*
	Disease	Source	Number of used SNPs	IVW			Weighted median		MR-Egger			MR-PRESSO†
				Cochran's Q P value	OR (95%CI)	P value	OR (95%CI)	P value	OR (95%CI)	P value	P intercept	Outliers	OR (95%CI)	P value
	Gastroesophageal reflux	UK Biobank	300	4.42156e-05	1.31 (1.19, 1.44)	1.69809e-08	1.24 (1.10, 1.40)	0.000455376	1.25 (0.85, 1.84)	0.250294	0.821571	1	1.29 (1.18, 1.41)	3.83215e-08
	Gastroesophageal reflux	FinnGen	283	1.49351e-07	1.26 (1.15, 1.37)	3.93432e-07	1.21 (1.08, 1.36)	0.00102414	1.11 (0.77, 1.61)	0.566801	0.50851	1	1.23 (1.13, 1.34)	2.10695e-06
	Gastroesophageal reflux	Meta-analysis	-	-	1.28 (1.20, 1.37)	4.08553e-14	1.22 (1.13, 1.33)	1.63382e-06	1.18 (0.90, 1.54)	0.226501	NA	NA	NA	NA
	Esophageal cancer	UK Biobank	300	0.0118057	1.85 (1.27, 2.71)	0.00148446	1.53 (0.91, 2.58)	0.111035	1.62 (0.34, 7.75)	0.547153	0.861506	1	1.97 (1.37, 2.83)	0.000287642
	Esophageal cancer	FinnGen	283	0.663438	1.42 (0.89, 2.28)	0.141755	1.58 (0.77, 3.21)	0.211054	12.02 (1.62, 89.05)	0.0156048	0.0324374	NA	NA	NA
	Esophageal cancer	Meta-analysis	-	-	1.67 (1.24, 2.25)	0.000684089	1.54 (1.01, 2.35)	0.0429074	3.46 (1.01, 11.89)	0.0484608	NA	NA	NA	NA
	Gastric ulcer	UK Biobank	300	0.0318448	1.51 (1.29, 1.77)	3.05207e-07	1.39 (1.11, 1.74)	0.0041037	1.50 (0.78, 2.88)	0.220003	0.987792	NA	NA	NA
	Gastric ulcer	FinnGen	283	0.044082	1.56 (1.34, 1.83)	2.41502e-08	1.54 (1.24, 1.92)	0.000114869	1.40 (0.73, 2.69)	0.315722	0.732671	NA	NA	NA
	Gastric ulcer	Meta-analysis	-	-	1.54 (1.37, 1.72)	3.82925e-14	1.47 (1.25, 1.72)	1.90386e-06	1.45 (0.91, 2.30)	0.114018	NA	NA	NA	NA
	Duodenal ulcer	UK Biobank	300	0.0412784	1.56 (1.30, 1.88)	2.16282e-06	1.66 (1.28, 2.16)	0.000119981	1.95 (0.92, 4.16)	0.0840847	0.54909	NA	NA	NA
	Duodenal ulcer	FinnGen	283	0.0436276	1.50 (1.22, 1.83)	9.21021e-05	1.29 (0.96, 1.73)	0.0888528	0.92 (0.39, 2.13)	0.8381	0.239713	NA	NA	NA
	Duodenal ulcer	Meta-analysis	-	-	1.53 (1.34, 1.75)	8.46781e-10	1.49 (1.23, 1.81)	6.07219e-05	1.39 (0.79, 2.44)	0.249258	NA	NA	NA	NA
	Acute gastritis	UK Biobank	300	0.729858	1.21 (0.92, 1.57)	0.166992	1.19 (0.79, 1.77)	0.404118	1.05 (0.34, 3.22)	0.927692	0.807433	NA	NA	NA
	Acute gastritis	FinnGen	283	0.531485	1.36 (1.09, 1.70)	0.00736357	1.35 (0.96, 1.88)	0.0806737	2.50 (0.97, 6.41)	0.0577722	0.193664	NA	NA	NA
	Acute gastritis	Meta-analysis	-	-	1.29 (1.09, 1.53)	0.00331646	1.28 (0.99, 1.65)	0.0606448	1.74 (0.85, 3.59)	0.129775	NA	NA	NA	NA
	Chronic gastritis	UK Biobank	300	0.864721	1.34 (0.84, 2.13)	0.214914	1.11 (0.54, 2.31)	0.772041	0.70 (0.10, 5.14)	0.726742	0.511379	NA	NA	NA
	Chronic gastritis	FinnGen	283	0.183237	1.32 (1.18, 1.49)	3.4521e-06	1.41 (1.19, 1.66)	7.2202e-05	1.63 (0.99, 2.67)	0.0534883	0.396009	NA	NA	NA
	Chronic gastritis	Meta-analysis	-	-	1.33 (1.18, 1.49)	1.55157e-06	1.39 (1.18, 1.64)	8.38938e-05	1.55 (0.96, 2.51)	0.072209	NA	NA	NA	NA
	Gastric cancer	UK Biobank	300	0.308912	1.81 (1.21, 2.71)	0.00391198	1.75 (0.97, 3.15)	0.0635111	6.05 (1.16, 31.65)	0.0338399	0.141907	NA	NA	NA
	Gastric cancer	FinnGen	283	0.949096	1.26 (0.96, 1.67)	0.101434	1.33 (0.86, 2.07)	0.202553	3.50 (1.00, 12.24)	0.0512767	0.102175	NA	NA	NA
	Gastric cancer	Meta-analysis	-	-	1.42 (1.13, 1.79)	0.0027906	1.47 (1.03, 2.09)	0.0330254	4.27 (1.57, 11.59)	0.00440604	NA	NA	NA	NA
	Irritable bowel syndrome	UK Biobank	300	0.0317003	1.34 (1.16, 1.53)	3.52266e-05	1.38 (1.13, 1.69)	0.00159055	0.81 (0.46, 1.42)	0.456185	0.0711733	NA	NA	NA
	Irritable bowel syndrome	FinnGen	283	0.00404998	1.18 (1.04, 1.35)	0.0111585	1.16 (0.96, 1.39)	0.115353	1.55 (0.90, 2.68)	0.116286	0.320373	2	1.15 (1.02, 1.30)	0.0221853
	Irritable bowel syndrome	GERA	293	0.760839	1.10 (0.93, 1.31)	0.267725	0.99 (0.77, 1.29)	0.965845	0.98 (0.48, 2.02)	0.957501	0.746152	NA	NA	NA
	Irritable bowel syndrome	Meta-analysis	-	-	1.22 (1.12, 1.32)	3.49608e-06	1.19 (1.06, 1.34)	0.00382436	1.09 (0.78, 1.54)	0.609758	NA	NA	NA	NA
	Celiac disease	UK Biobank	300	0.472568	0.80 (0.59, 1.09)	0.161185	0.98 (0.71, 1.36)	0.914628	1.06 (0.29, 3.80)	0.930412	0.612793	NA	NA	NA
	Celiac disease	FinnGen	283	2.83841e-47	0.84 (0.62, 1.13)	0.246411	0.97 (0.74, 1.27)	0.82028	1.27 (0.36, 4.43)	0.70897	0.502714	5	0.88 (0.73, 1.06)	0.188954
	Celiac disease	Meta-analysis	-	-	0.82 (0.66, 1.02)	0.0707523	0.98 (0.79, 1.21)	0.975085	1.16 (0.48, 2.84)	0.742799	NA	NA	NA	NA
	Diverticular disease	UK Biobank	300	6.18475e-11	1.29 (1.19, 1.39)	2.6854e-10	1.23 (1.11, 1.35)	5.23545e-05	1.06 (0.77, 1.46)	0.727647	0.221179	2	1.30 (1.21, 1.40)	2.6608e-11
	Diverticular disease	FinnGen	283	1.87285e-11	1.21 (1.11, 1.33)	2.60929e-05	1.20 (1.08, 1.34)	0.0010141	1.34 (0.92, 1.95)	0.130976	0.601605	NA	NA	NA
	Diverticular disease	Meta-analysis	-	-	1.25 (1.18, 1.33)	5.22703e-14	1.22 (1.13, 1.31)	1.92928e-07	1.17 (0.92, 1.49)	0.211737	NA	NA	NA	NA
	Crohn's disease	UK Biobank	300	0.0345309	1.27 (0.99, 1.61)	0.0560412	1.26 (0.89, 1.79)	0.198617	1.86 (0.69, 5.02)	0.220831	0.432535	NA	NA	NA
	Crohn's disease	FinnGen	283	9.73809e-05	1.29 (1.06, 1.58)	0.0129919	1.36 (1.04, 1.79)	0.0255969	1.48 (0.64, 3.45)	0.361245	0.742192	NA	NA	NA
	Crohn's disease	IIBDGC	299	3.59432e-08	1.20 (0.99, 1.44)	0.0597462	1.23 (0.97, 1.55)	0.0869879	0.65 (0.30, 1.41)	0.271902	0.110341	3	1.15 (0.96, 1.37)	0.122392
	Crohn's disease	Meta-analysis	-	-	1.25 (1.11, 1.40)	0.000303343	1.28 (1.09, 1.50)	0.00237819	1.12 (0.68, 1.84)	0.654673	NA	NA	NA	NA
	Ulcerative colitis	UK Biobank	300	0.00283602	1.30 (1.08, 1.56)	0.00602162	1.39 (1.07, 1.80)	0.0126584	1.34 (0.62, 2.88)	0.457072	0.936324	1	1.29 (1.08, 1.54)	0.00529738
	Ulcerative colitis	FinnGen	283	0.000205132	1.13 (0.99, 1.30)	0.0790541	1.12 (0.92, 1.35)	0.256353	0.80 (0.45, 1.42)	0.443921	0.221801	2	1.13 (0.99, 1.29)	0.0648892
	Ulcerative colitis	IIBDGC	299	0.000120298	1.06 (0.90, 1.24)	0.500964	1.02 (0.82, 1.26)	0.888859	0.65 (0.33, 1.28)	0.212487	0.146536	1	1.05 (0.91, 1.23)	0.499006
	Ulcerative colitis	Meta-analysis	-	-	1.15 (1.04, 1.26)	0.00376291	1.14 (1.00, 1.29)	0.042278	0.85 (0.58, 1.24)	0.399667	NA	NA	NA	NA
	Colorectal cancer	UK Biobank	300	0.0150299	1.09 (0.94, 1.27)	0.26978	1.13 (0.91, 1.40)	0.280019	0.85 (0.46, 1.60)	0.62203	0.432817	NA	NA	NA
	Colorectal cancer	FinnGen	283	0.0770308	0.97 (0.84, 1.13)	0.684466	0.93 (0.75, 1.16)	0.528706	0.71 (0.38, 1.32)	0.28278	0.314278	NA	NA	NA
	Colorectal cancer	Meta-analysis	-	-	1.03 (0.92, 1.14)	0.632283	1.02 (0.88, 1.19)	0.752305	0.78 (0.50, 1.21)	0.26582	NA	NA	NA	NA
	Non-alcoholic fatty liver disease	UK Biobank	300	0.472568	1.71 (1.36, 2.15)	5.00364e-06	1.87 (1.33, 2.65)	0.000356538	1.35 (0.52, 3.47)	0.537112	0.612793	NA	NA	NA
	Non-alcoholic fatty liver disease	FinnGen	283	0.404308	1.27 (0.99, 1.62)	0.0609202	1.07 (0.74, 1.56)	0.702923	1.14 (0.41, 3.20)	0.802781	0.837434	NA	NA	NA
	Non-alcoholic fatty liver disease	Meta-analysis	-	-	1.49 (1.26, 1.76)	3.81791e-06	1.45 (1.12, 1.86)	0.00406055	1.25 (0.62, 2.51)	0.532235	NA	NA	NA	NA
	Alcoholic liver disease	UK Biobank	300	0.00680102	2.27 (1.58, 3.27)	8.94523e-06	2.15 (1.29, 3.56)	0.00315957	4.27 (0.96, 18.92)	0.0573434	0.394125	NA	NA	NA
	Alcoholic liver disease	FinnGen	283	0.0570277	1.89 (1.51, 2.37)	2.52461e-08	1.87 (1.38, 2.55)	6.72426e-05	3.40 (1.33, 8.65)	0.0109053	0.208353	NA	NA	NA
	Alcoholic liver disease	Meta-analysis	-	-	1.99 (1.65, 2.41)	1.49039e-12	1.94 (1.49, 2.53)	7.84488e-07	3.62 (1.64, 7.99)	0.00144779	NA	NA	NA	NA
	Cirrhosis	UK Biobank	300	0.756289	1.46 (0.63, 3.40)	0.378885	1.22 (0.33, 4.52)	0.76181	0.05 (0.00, 1.84)	0.104719	0.0594423	NA	NA	NA
	Cirrhosis	FinnGen	283	0.0861426	1.69 (1.40, 2.04)	4.78132e-08	1.74 (1.34, 2.25)	3.00486e-05	2.64 (1.20, 5.80)	0.0159361	0.25214	NA	NA	NA
	Cirrhosis	Meta-analysis	-	-	1.68 (1.40, 2.02)	3.39238e-08	1.71 (1.33, 2.21)	3.29402e-05	2.20 (1.02, 4.75)	0.0433948	NA	NA	NA	NA
	Liver cancer	UK Biobank	300	0.216041	1.10 (0.65, 1.84)	0.728379	1.06 (0.50, 2.27)	0.874983	0.20 (0.02, 1.70)	0.142027	0.109519	NA	NA	NA
	Liver cancer	FinnGen	283	0.575596	1.99 (1.30, 3.04)	0.00148069	1.78 (0.91, 3.46)	0.0915764	0.81 (0.14, 4.82)	0.81603	0.309128	NA	NA	NA
	Liver cancer	Meta-analysis	-	-	1.57 (1.13, 2.17)	0.00741921	1.42 (0.86, 2.34)	0.170334	0.46 (0.12, 1.79)	0.260155	NA	NA	NA	NA
	Cholangitis	UK Biobank	300	0.714345	1.17 (0.77, 1.77)	0.463442	1.34 (0.71, 2.54)	0.364077	0.54 (0.09, 3.09)	0.4858	0.369409	NA	NA	NA
	Cholangitis	FinnGen	283	0.0781553	0.95 (0.71, 1.27)	0.724215	1.04 (0.69, 1.58)	0.849333	2.79 (0.82, 9.45)	0.101379	0.0760639	NA	NA	NA
	Cholangitis	Meta-analysis	-	-	1.02 (0.80, 1.29)	0.892664	1.12 (0.79, 1.59)	0.513119	1.63 (0.60, 4.43)	0.342194	NA	NA	NA	NA
	Cholecystitis	UK Biobank	300	0.28825	1.52 (1.27, 1.83)	6.39202e-06	1.47 (1.12, 1.92)	0.00515076	1.75 (0.83, 3.72)	0.145326	0.708071	NA	NA	NA
	Cholecystitis	FinnGen	283	0.128827	1.42 (1.18, 1.71)	0.000164259	1.53 (1.17, 1.99)	0.0015894	1.78 (0.83, 3.83)	0.140878	0.555368	NA	NA	NA
	Cholecystitis	Meta-analysis	-	-	1.47 (1.29, 1.68)	4.70507e-09	1.50 (1.24, 1.81)	2.51277e-05	1.77 (1.03, 3.02)	0.0378573	NA	NA	NA	NA
	Cholelithiasis	UK Biobank	300	1.71235e-05	1.33 (1.21, 1.47)	6.67243e-09	1.28 (1.12, 1.46)	0.000277614	1.11 (0.74, 1.65)	0.614974	0.350427	NA	NA	NA
	Cholelithiasis	FinnGen	283	5.83726e-09	1.12 (1.03, 1.21)	0.00471257	1.05 (0.95, 1.16)	0.338553	0.92 (0.67, 1.28)	0.631639	0.233718	NA	NA	NA
	Cholelithiasis	Meta-analysis	-	-	1.20 (1.13, 1.27)	5.74527e-09	1.13 (1.04, 1.22)	0.0030765	0.99 (0.77, 1.28)	0.9544	NA	NA	NA	NA
	Acute pancreatitis	UK Biobank	300	0.163352	1.36 (1.09, 1.69)	0.0059269	1.30 (0.94, 1.80)	0.116621	1.27 (0.52, 3.11)	0.607662	0.873645	NA	NA	NA
	Acute pancreatitis	FinnGen	283	0.628931	1.40 (1.22, 1.62)	3.31118e-06	1.31 (1.04, 1.64)	0.0200574	1.71 (0.94, 3.11)	0.0824223	0.50769	NA	NA	NA
	Acute pancreatitis	Meta-analysis	-	-	1.39 (1.23, 1.56)	6.71487e-08	1.30 (1.08, 1.57)	0.00503201	1.56 (0.94, 2.56)	0.0828641	NA	NA	NA	NA
	Chronic pancreatitis	UK Biobank	300	0.403715	2.14 (1.41, 3.24)	0.000329345	2.23 (1.17, 4.25)	0.014858	1.04 (0.19, 5.72)	0.965025	0.393086	NA	NA	NA
	Chronic pancreatitis	FinnGen	283	0.716225	1.27 (1.05, 1.52)	0.0124332	1.13 (0.85, 1.50)	0.401912	2.15 (0.97, 4.75)	0.0589786	0.177835	NA	NA	NA
	Chronic pancreatitis	Meta-analysis	-	-	1.38 (1.17, 1.64)	0.00017945	1.26 (0.97, 1.64)	0.0800559	1.89 (0.92, 3.88)	0.0821607	NA	NA	NA	NA
	Pancreatic cancer	UK Biobank	300	0.307632	1.22 (0.83, 1.81)	0.312215	1.50 (0.84, 2.67)	0.171651	3.73 (0.75, 18.57)	0.10853	0.160886	NA	NA	NA
	Pancreatic cancer	FinnGen	283	0.833431	0.90 (0.67, 1.20)	0.455589	1.05 (0.67, 1.64)	0.843289	1.23 (0.35, 4.29)	0.750249	0.613911	NA	NA	NA
	Pancreatic cancer	Meta-analysis	-	-	1.00 (0.79, 1.26)	0.998883	1.20 (0.84, 1.71)	0.318286	1.87 (0.70, 5.01)	0.214442	NA	NA	NA	NA
	Acute appendicitis	UK Biobank	300	0.367609	1.05 (0.87, 1.26)	0.613007	1.10 (0.82, 1.48)	0.521518	2.40 (1.12, 5.14)	0.0244663	0.028318	NA	NA	NA
	Acute appendicitis	FinnGen	283	0.426241	1.17 (1.09, 1.25)	8.18256e-06	1.21 (1.10, 1.34)	0.000106523	1.12 (0.85, 1.49)	0.422488	0.784927	NA	NA	NA
	Acute appendicitis	Meta-analysis	-	-	1.15 (1.08, 1.23)	1.26788e-05	1.20 (1.10, 1.32)	0.000105171	1.23 (0.94, 1.60)	0.123778	NA	NA	NA	NA
	OR, odd ratio; CI, condifence interval; IVW, inverse variance weighted; MR, Mendelian randomization; MR-PRESSO, Mendelian Randomization Pleiotropy RESidual Sum and Outlier; GERA, Genetic Epidemiology Research on Aging; IIBDGC, The International Inflammatory Bowel Disease Genetics Consortium
	*ORs for gatrointestinal diseases were scaled to genetically predicted 1 standard deviation increase log odds of ever smoked regularly. Estimates with P<0.05 in IVW analysis are reported in bold.
	†Outlier-corrected estimate. NA, not available (if no outliers were detected).

## Sheet: G
	Supplementary file 1G. Association of genetically-predicted smoking initiation (excluding 23andMe and UK Biobank), alcohol consumption (excluding 23andMe and UK Biobank) and lifetime smoking index with gastrointestinal disease in univariable Mendelian randomization*
	Disease	Source	Smoking initiation (excluding 23andMe and UK Biobank)				Alcohol consumption (excluding 23andMe and UK Biobank)				Lifetime smoking index
			Number of used SNPs	OR (95%CI)	P value		Number of used SNPs	OR (95%CI)	P value		Number of used SNPs	OR (95%CI)	P value
	Gastroesophageal reflux	UK Biobank	300	1.31 (1.19, 1.44)	1.7e-08		80	0.78 (0.58, 1.05)	0.0967149		120	1.59 (1.30, 1.94)	7.26477e-06
	Gastroesophageal reflux	FinnGen	283	1.26 (1.15, 1.37)	3.93e-07		77	1.14 (0.86, 1.52)	0.371113		116	1.32 (1.11, 1.56)	0.00126147
	Gastroesophageal reflux	Meta-analysis	-	1.28 (1.20, 1.37)	4.09e-14		-	0.95 (0.77, 1.17)	0.616091		-	1.42 (1.25, 1.62)	8.79906e-08
	Esophageal cancer	UK Biobank	300	1.85 (1.27, 2.71)	0.00148446		80	2.91 (0.95, 8.90)	0.0611222		120	2.31 (1.20, 4.47)	0.0126921
	Esophageal cancer	FinnGen	283	1.42 (0.89, 2.28)	0.141755		77	1.73 (0.35, 8.54)	0.503041		116	2.41 (0.88, 6.61)	0.088638
	Esophageal cancer	Meta-analysis	-	1.67 (1.24, 2.25)	0.000684089		-	2.45 (0.98, 6.13)	0.0550632		-	2.34 (1.35, 4.06)	0.00254721
	Gastric ulcer	UK Biobank	300	1.51 (1.29, 1.77)	3.05e-07		80	1.04 (0.66, 1.64)	0.850132		120	2.19 (1.57, 3.04)	3.56974e-06
	Gastric ulcer	FinnGen	283	1.56 (1.34, 1.83)	2.42e-08		77	1.76 (1.12, 2.74)	0.0134311		116	1.62 (1.18, 2.23)	0.00287452
	Gastric ulcer	Meta-analysis	-	1.54 (1.37, 1.72)	3.83e-14		-	1.36 (0.99, 1.87)	0.0581586		-	1.87 (1.49, 2.36)	8.18196e-08
	Duodenal ulcer	UK Biobank	300	1.56 (1.30, 1.88)	2.16e-06		80	1.79 (1.02, 3.12)	0.0411573		120	2.74 (1.97, 3.83)	2.75257e-09
	Duodenal ulcer	FinnGen	283	1.50 (1.22, 1.83)	9.21e-05		77	3.34 (1.53, 7.27)	0.00241038		116	2.12 (1.45, 3.11)	0.00010592
	Duodenal ulcer	Meta-analysis	-	1.53 (1.34, 1.75)	8.47e-10		-	2.21 (1.40, 3.47)	0.000611394		-	2.46 (1.91, 3.15)	2.09363e-12
	Acute gastritis	UK Biobank	300	1.21 (0.92, 1.57)	0.166992		80	1.17 (0.53, 2.60)	0.698699		120	1.54 (0.92, 2.58)	0.100255
	Acute gastritis	FinnGen	283	1.36 (1.09, 1.70)	0.00736357		77	0.80 (0.37, 1.74)	0.579149		116	1.30 (0.82, 2.05)	0.261914
	Acute gastritis	Meta-analysis	-	1.29 (1.09, 1.53)	0.00331645		-	0.96 (0.55, 1.68)	0.89822		-	1.40 (0.99, 1.97)	0.0535581
	Chronic gastritis	UK Biobank	300	1.34 (0.84, 2.13)	0.214914		80	4.43 (0.98, 20.08)	0.0536903		120	2.55 (0.96, 6.75)	0.0600952
	Chronic gastritis	FinnGen	283	1.32 (1.18, 1.49)	3.45e-06		77	1.16 (0.76, 1.76)	0.487302		116	1.22 (0.97, 1.53)	0.0891215
	Chronic gastritis	Meta-analysis	-	1.33 (1.18, 1.49)	1.55e-06		-	1.27 (0.85, 1.90)	0.23729		-	1.27 (1.01, 1.58)	0.037167
	Gastric cancer	UK Biobank	300	1.81 (1.21, 2.71)	0.00391198		80	1.67 (0.53, 5.29)	0.385092		120	2.08 (0.95, 4.59)	0.0682125
	Gastric cancer	FinnGen	283	1.26 (0.96, 1.67)	0.101434		77	1.09 (0.40, 3.01)	0.867348		116	0.96 (0.50, 1.86)	0.913672
	Gastric cancer	Meta-analysis	-	1.42 (1.13, 1.79)	0.101434		-	1.31 (0.61, 2.81)	0.484477		-	1.32 (0.80, 2.19)	0.27839
	Irritable bowel syndrome	UK Biobank	300	1.34 (1.16, 1.53)	3.52e-05		80	0.87 (0.56, 1.34)	0.522519		120	1.56 (1.15, 2.11)	0.00425957
	Irritable bowel syndrome	FinnGen	283	1.18 (1.04, 1.35)	0.0111585		77	0.75 (0.51, 1.09)	0.129848		116	1.21 (0.95, 1.53)	0.116931
	Irritable bowel syndrome	GERA	293	1.10 (0.93, 1.31)	0.267725		79	0.63 (0.34, 1.15)	0.132496		117	1.14 (0.76, 1.70)	0.537085
	Irritable bowel syndrome	Meta-analysis	-	1.22 (1.12, 1.32)	3.5e-06		-	0.76 (0.59, 0.99)	0.0402801		-	1.29 (1.09, 1.53)	0.00293121
	Celiac disease	UK Biobank	300	0.88 (0.66, 1.17)	0.369443		80	0.63 (0.32, 1.23)	0.173465		120	1.33 (0.75, 2.35)	0.330997
	Celiac disease	FinnGen	283	0.93 (0.71, 1.22)	0.587202		77	0.81 (0.44, 1.50)	0.500622		116	0.86 (0.53, 1.41)	0.550797
	Celiac disease	Meta-analysis	-	0.90 (0.74, 1.10)	0.311196		-	0.72 (0.46, 1.13)	0.156742		-	1.04 (0.71, 1.50)	0.853297
	Diverticular disease	UK Biobank	300	1.29 (1.19, 1.39)	2.69e-10		80	1.15 (0.87, 1.53)	0.331271		120	1.38 (1.14, 1.67)	0.000816947
	Diverticular disease	FinnGen	283	1.21 (1.11, 1.33)	2.61e-05		77	0.83 (0.65, 1.05)	0.120934		116	1.22 (1.01, 1.47)	0.0411923
	Diverticular disease	Meta-analysis	-	1.25 (1.18, 1.33)	5.23e-14		-	0.95 (0.79, 1.14)	0.58442		-	1.30 (1.13, 1.48)	0.000140623
	Crohn's disease	UK Biobank	300	1.27 (0.99, 1.61)	0.0560412		80	1.05 (0.53, 2.09)	0.892932		120	1.06 (0.63, 1.78)	0.833393
	Crohn's disease	FinnGen	283	1.29 (1.06, 1.58)	0.0129919		77	1.28 (0.68, 2.40)	0.439663		116	0.95 (0.64, 1.40)	0.779925
	Crohn's disease	IIBDGC	299	1.20 (0.99, 1.44)	0.0597462		81	0.63 (0.32, 1.26)	0.194738		120	1.20 (0.82, 1.77)	0.343707
	Crohn's disease	Meta-analysis	-	1.25 (1.11, 1.40)	0.000303343		-	0.97 (0.66, 1.42)	0.862105		-	1.07 (0.84, 1.36)	0.601416
	Ulcerative colitis	UK Biobank	300	1.30 (1.08, 1.56)	0.00602162		80	1.07 (0.58, 1.99)	0.826378		120	1.32 (0.90, 1.95)	0.159834
	Ulcerative colitis	FinnGen	283	1.13 (0.99, 1.30)	0.0790541		77	1.35 (0.83, 2.19)	0.232208		116	0.99 (0.75, 1.32)	0.969087
	Ulcerative colitis	IIBDGC	299	1.06 (0.90, 1.24)	0.500964		81	0.92 (0.54, 1.56)	0.757164		120	0.76 (0.53, 1.10)	0.149611
	Ulcerative colitis	Meta-analysis	-	1.15 (1.04, 1.26)	0.00376291		-	1.12 (0.82, 1.52)	0.490748		-	0.99 (0.82, 1.20)	0.930788
	Colorectal cancer	UK Biobank	300	1.09 (0.94, 1.27)	0.26978		80	1.32 (0.80, 2.20)	0.274869		120	1.25 (0.92, 1.68)	0.15349
	Colorectal cancer	FinnGen	283	0.97 (0.84, 1.13)	0.684466		77	0.98 (0.58, 1.67)	0.943519		116	1.01 (0.72, 1.41)	0.972434
	Colorectal cancer	Meta-analysis	-	1.03 (0.92, 1.14)	0.632283		-	1.15 (0.80, 1.66)	0.458298		-	1.13 (0.91, 1.42)	0.274678
	Non-alcoholic fatty liver disease	UK Biobank	300	1.71 (1.36, 2.15)	5e-06		80	1.28 (0.53, 3.10)	0.586523		120	2.94 (1.79, 4.82)	1.97281e-05
	Non-alcoholic fatty liver disease	FinnGen	283	1.27 (0.99, 1.62)	0.0609202		77	1.17 (0.44, 3.12)	0.754477		116	1.92 (1.16, 3.16)	0.010843
	Non-alcoholic fatty liver disease	Meta-analysis	-	1.49 (1.26, 1.76)	3.82e-06		-	1.23 (0.64, 2.37)	0.53974		-	2.38 (1.67, 3.38)	1.39786e-06
	Alcoholic liver disease	UK Biobank	300	2.27 (1.58, 3.27)	8.95e-06		80	54.36 (18.98, 155.71)	9.94195e-14		120	3.85 (1.74, 8.51)	0.000850727
	Alcoholic liver disease	FinnGen	283	1.89 (1.51, 2.37)	2.52e-08		77	5.30 (2.31, 12.17)	8.22374e-05		116	2.62 (1.66, 4.15)	3.55402e-05
	Alcoholic liver disease	Meta-analysis	-	1.99 (1.65, 2.41)	1.49e-12		-	12.95 (6.75, 24.86)	1.35001e-14		-	2.89 (1.94, 4.29)	1.5329e-07
	Cirrhosis	UK Biobank	300	1.46 (0.63, 3.40)	0.378885		80	0.91 (0.05, 17.04)	0.949299		120	0.91 (0.13, 6.31)	0.925758
	Cirrhosis	FinnGen	283	1.69 (1.40, 2.04)	4.78e-08		77	2.73 (1.31, 5.72)	0.00764908		116	2.16 (1.50, 3.11)	3.37811e-05
	Cirrhosis	Meta-analysis	-	1.68 (1.40, 2.02)	3.39e-08		-	2.56 (1.25, 5.24)	0.0101464		-	2.10 (1.47, 3.00)	4.95896e-05
	Liver cancer	UK Biobank	300	1.10 (0.65, 1.84)	0.728379		80	2.74 (0.59, 12.79)	0.199411		120	2.19 (0.86, 5.61)	0.102169
	Liver cancer	FinnGen	283	1.99 (1.30, 3.04)	0.00148069		77	0.76 (0.20, 2.89)	0.691685		116	2.75 (1.13, 6.73)	0.0262957
	Liver cancer	Meta-analysis	-	1.57 (1.13, 2.17)	0.00741921		-	1.32 (0.48, 3.61)	0.590349		-	2.47 (1.29, 4.72)	0.00621262
	Cholangitis	UK Biobank	300	1.17 (0.77, 1.77)	0.463442		80	1.11 (0.30, 4.10)	0.870444		120	2.20 (0.95, 5.11)	0.0671117
	Cholangitis	FinnGen	283	0.95 (0.71, 1.27)	0.724215		77	0.77 (0.28, 2.15)	0.620384		116	0.93 (0.51, 1.70)	0.819207
	Cholangitis	Meta-analysis	-	1.02 (0.80, 1.29)	0.892664		-	0.89 (0.40, 1.99)	0.77308		-	1.24 (0.76, 2.03)	0.381732
	Cholecystitis	UK Biobank	300	1.52 (1.27, 1.83)	6.39e-06		80	0.79 (0.45, 1.39)	0.4196		120	2.32 (1.60, 3.38)	1.09226e-05
	Cholecystitis	FinnGen	283	1.42 (1.18, 1.71)	0.000164259		77	1.98 (1.06, 3.69)	0.0314984		116	1.40 (0.98, 2.01)	0.0681672
	Cholecystitis	Meta-analysis	-	1.47 (1.29, 1.68)	4.71e-09		-	1.20 (0.79, 1.81)	0.401713		-	1.79 (1.38, 2.32)	1.28206e-05
	Cholelithiasis	UK Biobank	300	1.33 (1.21, 1.47)	6.67e-09		80	1.01 (0.64, 1.59)	0.95485		120	1.55 (1.28, 1.89)	1.01733e-05
	Cholelithiasis	FinnGen	283	1.12 (1.03, 1.21)	0.00471257		77	0.93 (0.60, 1.45)	0.753645		116	1.30 (1.10, 1.54)	0.00220109
	Cholelithiasis	Meta-analysis	-	1.20 (1.13, 1.27)	5.75e-09		-	0.97 (0.71, 1.33)	0.852338		-	1.41 (1.24, 1.60)	1.96137e-07
	Acute pancreatitis	UK Biobank	300	1.36 (1.09, 1.69)	0.0059269		80	0.66 (0.33, 1.32)	0.239699		120	1.31 (0.83, 2.07)	0.251163
	Acute pancreatitis	FinnGen	283	1.40 (1.22, 1.62)	3.31e-06		77	1.70 (1.01, 2.85)	0.0454831		116	1.85 (1.32, 2.58)	0.000309519
	Acute pancreatitis	Meta-analysis	-	1.39 (1.23, 1.56)	6.71e-08		-	1.21 (0.80, 1.83)	0.36759		-	1.64 (1.25, 2.15)	0.000326956
	Chronic pancreatitis	UK Biobank	300	2.14 (1.41, 3.24)	0.000329345		80	2.38 (0.60, 9.43)	0.216237		120	3.37 (1.41, 8.05)	0.00619617
	Chronic pancreatitis	FinnGen	283	1.27 (1.05, 1.52)	0.0124332		77	2.93 (1.66, 5.18)	0.000220403		116	2.17 (1.45, 3.24)	0.000152103
	Chronic pancreatitis	Meta-analysis	-	1.38 (1.17, 1.64)	0.00017945		-	2.84 (1.68, 4.81)	0.000101773		-	2.35 (1.63, 3.38)	4.52244e-06
	Pancreatic cancer	UK Biobank	300	1.22 (0.83, 1.81)	0.312215		80	1.43 (0.50, 4.06)	0.501557		120	3.23 (1.55, 6.73)	0.00176388
	Pancreatic cancer	FinnGen	283	0.90 (0.67, 1.20)	0.455589		77	0.42 (0.16, 1.11)	0.080286		116	1.52 (0.82, 2.84)	0.186198
	Pancreatic cancer	Meta-analysis	-	1.00 (0.79, 1.26)	0.998883		-	0.74 (0.36, 1.52)	0.41511		-	2.09 (1.30, 3.36)	0.00242506
	Acute appendicitis	UK Biobank	300	1.05 (0.87, 1.26)	0.613007		80	0.98 (0.56, 1.71)	0.94442		120	1.37 (0.96, 1.96)	0.0872353
	Acute appendicitis	FinnGen	283	1.17 (1.09, 1.25)	8.18e-06		77	0.77 (0.59, 1.01)	0.0606863		116	1.14 (0.99, 1.31)	0.0655676
	Acute appendicitis	Meta-analysis	-	1.15 (1.08, 1.23)	1.27e-05		-	0.81 (0.63, 1.03)	0.0864894		-	1.17 (1.02, 1.33)	0.019703
	OR, odd ratio; CI, condifence interval; IVW, inverse variance weighted; MR, Mendelian randomization; MR-PRESSO, Mendelian Randomization Pleiotropy RESidual Sum and Outlier; GERA, Genetic Epidemiology Research on Aging; IIBDGC, The International Inflammatory Bowel Disease Genetics Consortium
	*ORs for gatrointestinal diseases were scaled to genetically predicted per 1 standard deviation increase log odds of ever smoked regularly or per 1 standard deviation increase in alcoholic comsumption or per 1 standard deviation increase of the lifetime smoking index. Estimates with P<0.05 are reported in bold.

## Sheet: H
	Supplementary file 1H. Association of genetically-predicted smoke initiation and alcohol consumption with gastrointestinal disease in multivaribale Mendelian randomization*
	Disease	Source	Smoke initiation			Alcohol consumption
			OR (95% CI)	P value		OR (95% CI)	P value
	Gastroesophageal reflux	UK Biobank	1.86 (1.39, 2.49)	3.19102e-05		0.79 (0.60, 1.03)	0.0791945
	Gastroesophageal reflux	FinnGen	1.48 (1.11, 1.96)	0.00719089		1.02 (0.75, 1.38)	0.890202
	Gastroesophageal reflux	Meta-analysis	1.65 (1.35, 2.02)	1.38126e-06		0.88 (0.72, 1.08)	0.219248
	Esophageal cancer	UK Biobank	3.79 (1.39, 10.30)	0.00900494		1.97 (0.79, 4.91)	0.143226
	Esophageal cancer	FinnGen	7.81 (1.83, 33.44)	0.00557079		0.37 (0.08, 1.74)	0.206928
	Esophageal cancer	Meta-analysis	4.78 (2.10, 10.90)	0.000196969		1.28 (0.59, 2.82)	0.532689
	Gastric ulcer	UK Biobank	1.64 (1.02, 2.63)	0.0405384		1.10 (0.71, 1.69)	0.67278
	Gastric ulcer	FinnGen	2.29 (1.45, 3.62)	0.000403099		1.02 (0.62, 1.66)	0.950217
	Gastric ulcer	Meta-analysis	1.95 (1.40, 2.71)	7.30689e-05		1.06 (0.77, 1.47)	0.720643
	Duodenal ulcer	UK Biobank	2.19 (1.26, 3.81)	0.00555412		1.53 (0.92, 2.55)	0.101438
	Duodenal ulcer	FinnGen	1.07 (0.54, 2.10)	0.854488		1.54 (0.74, 3.23)	0.248612
	Duodenal ulcer	Meta-analysis	1.64 (1.07, 2.52)	0.0235668		1.54 (1.01, 2.34)	0.045137
	Acute gastritis	UK Biobank	1.55 (0.65, 3.65)	0.320419		1.17 (0.53, 2.57)	0.692801
	Acute gastritis	FinnGen	1.54 (0.79, 3.01)	0.202103		0.69 (0.34, 1.40)	0.304913
	Acute gastritis	Meta-analysis	1.54 (0.91, 2.62)	0.105901		0.88 (0.52, 1.48)	0.620533
	Chronic gastritis	UK Biobank	1.48 (0.37, 5.91)	0.578851		1.55 (0.43, 5.57)	0.503918
	Chronic gastritis	FinnGen	1.33 (0.94, 1.87)	0.108648		1.31 (0.91, 1.89)	0.147691
	Chronic gastritis	Meta-analysis	1.33 (0.96, 1.86)	0.0908661		1.33 (0.93, 1.89)	0.115057
	Gastric cancer	UK Biobank	3.23 (0.98, 10.68)	0.0548962		1.78 (0.60, 5.32)	0.299077
	Gastric cancer	FinnGen	1.92 (0.82, 4.52)	0.134794		1.47 (0.59, 3.66)	0.410096
	Gastric cancer	Meta-analysis	2.29 (1.14, 4.59)	0.0196426		1.59 (0.79, 3.21)	0.194325
	Irritable bowel syndrome	UK Biobank	1.33 (0.86, 2.07)	0.201019		0.75 (0.50, 1.13)	0.166973
	Irritable bowel syndrome	FinnGen	1.57 (1.07, 2.30)	0.021315		0.82 (0.55, 1.24)	0.355919
	Irritable bowel syndrome	GERA	1.28 (0.70, 2.32)	0.421747		0.56 (0.29, 1.06)	0.0767892
	Irritable bowel syndrome	Meta-analysis	1.43 (1.10, 1.85)	0.00759488		0.74 (0.57, 0.97)	0.0270721
	Celiac disease	UK Biobank	0.60 (0.30, 1.17)	0.135268		1.27 (0.61, 2.62)	0.520533
	Celiac disease	FinnGen	1.34 (0.65, 2.74)	0.425014		0.88 (0.46, 1.69)	0.698184
	Celiac disease	Meta-analysis	0.87 (0.53, 1.43)	0.590469		1.04 (0.64, 1.68)	0.886532
	Diverticular disease	UK Biobank	1.64 (1.29, 2.08)	4.50384e-05		0.99 (0.80, 1.23)	0.948185
	Diverticular disease	FinnGen	1.46 (1.10, 1.93)	0.00807243		0.86 (0.64, 1.16)	0.32406
	Diverticular disease	Meta-analysis	1.56 (1.30, 1.87)	1.41196e-06		0.94 (0.79, 1.13)	0.526502
	Crohn's disease	UK Biobank	2.38 (1.11, 5.10)	0.0251852		1.05 (0.52, 2.09)	0.896896
	Crohn's disease	FinnGen	1.27 (0.71, 2.26)	0.422176		0.58 (0.31, 1.08)	0.0846407
	Crohn's disease	IIBDGC	1.26 (0.65, 2.45)	0.488899		0.73 (0.44, 1.22)	0.226027
	Crohn's disease	Meta-analysis	1.48 (1.01, 2.16)	0.0421468		0.74 (0.53, 1.05)	0.0884572
	Ulcerative colitis	UK Biobank	1.46 (0.78, 2.72)	0.236792		0.82 (0.47, 1.46)	0.506176
	Ulcerative colitis	FinnGen	0.78 (0.52, 1.18)	0.240149		0.99 (0.64, 1.54)	0.974838
	Ulcerative colitis	IIBDGC	0.94 (0.56, 1.57)	0.805281		0.82 (0.54, 1.25)	0.354371
	Ulcerative colitis	Meta-analysis	0.94 (0.71, 1.25)	0.677199		0.88 (0.67, 1.15)	0.358227
	Colorectal cancer	UK Biobank	1.44 (0.93, 2.21)	0.0985361		1.14 (0.77, 1.68)	0.525562
	Colorectal cancer	FinnGen	0.75 (0.50, 1.14)	0.18369		1.50 (0.96, 2.34)	0.0750106
	Colorectal cancer	Meta-analysis	1.03 (0.76, 1.39)	0.841008		1.28 (0.95, 1.72)	0.0983815
	Non-alcoholic fatty liver disease	UK Biobank	3.45 (1.42, 8.37)	0.00620604		1.06 (0.47, 2.38)	0.893881
	Non-alcoholic fatty liver disease	FinnGen	1.37 (0.60, 3.16)	0.453132		0.91 (0.37, 2.20)	0.827973
	Non-alcoholic fatty liver disease	Meta-analysis	2.11 (1.15, 3.88)	0.015548		0.99 (0.54, 1.79)	0.961506
	Alcoholic liver disease	UK Biobank	2.67 (0.85, 8.33)	0.0910433		38.26 (13.11, 111.63)	2.55056e-11
	Alcoholic liver disease	FinnGen	2.13 (1.08, 4.18)	0.0280886		5.13 (2.49, 10.55)	8.84381e-06
	Alcoholic liver disease	Meta-analysis	2.26 (1.26, 4.03)	0.00594655		9.60 (5.28, 17.46)	1.24723e-13
	Cirrhosis	UK Biobank	1.30 (0.09, 19.73)	0.84921		1.04 (0.09, 12.58)	0.976838
	Cirrhosis	FinnGen	1.95 (1.06, 3.59)	0.0308768		2.55 (1.34, 4.89)	0.00459493
	Cirrhosis	Meta-analysis	1.92 (1.06, 3.47)	0.0317062		2.41 (1.29, 4.52)	0.00595437
	Liver cancer	UK Biobank	0.95 (0.22, 4.09)	0.94479		0.56 (0.15, 2.13)	0.396463
	Liver cancer	FinnGen	3.59 (0.94, 13.70)	0.0613149		1.08 (0.26, 4.47)	0.916497
	Liver cancer	Meta-analysis	1.96 (0.73, 5.25)	0.182783		0.76 (0.29, 2.02)	0.584863
	Cholangitis	UK Biobank	0.56 (0.16, 1.88)	0.345236		1.38 (0.45, 4.20)	0.575753
	Cholangitis	FinnGen	2.32 (0.86, 6.26)	0.0972169		0.40 (0.14, 1.15)	0.0901491
	Cholangitis	Meta-analysis	1.31 (0.61, 2.84)	0.488962		0.72 (0.33, 1.55)	0.39687
	Cholecystitis	UK Biobank	2.53 (1.40, 4.60)	0.00225961		0.86 (0.50, 1.49)	0.599782
	Cholecystitis	FinnGen	2.24 (1.26, 3.99)	0.00596007		1.11 (0.60, 2.05)	0.742267
	Cholecystitis	Meta-analysis	2.38 (1.57, 3.60)	4.14107e-05		0.96 (0.64, 1.45)	0.862483
	Cholelithiasis	UK Biobank	1.83 (1.22, 2.75)	0.0037052		1.11 (0.76, 1.61)	0.583826
	Cholelithiasis	FinnGen	1.05 (0.74, 1.49)	0.772989		0.96 (0.66, 1.40)	0.848278
	Cholelithiasis	Meta-analysis	1.33 (1.02, 1.73)	0.0348326		1.03 (0.79, 1.35)	0.80113
	Acute pancreatitis	UK Biobank	1.69 (0.80, 3.57)	0.168052		0.68 (0.34, 1.35)	0.270945
	Acute pancreatitis	FinnGen	1.50 (0.94, 2.40)	0.0922953		1.56 (0.94, 2.59)	0.0824764
	Acute pancreatitis	Meta-analysis	1.55 (1.04, 2.31)	0.0308592		1.17 (0.78, 1.75)	0.455551
	Chronic pancreatitis	UK Biobank	1.58 (0.44, 5.67)	0.485853		2.99 (0.93, 9.66)	0.0672821
	Chronic pancreatitis	FinnGen	1.21 (0.67, 2.17)	0.523324		3.32 (1.77, 6.22)	0.000184376
	Chronic pancreatitis	Meta-analysis	1.27 (0.74, 2.16)	0.38408		3.24 (1.86, 5.64)	3.17759e-05
	Pancreatic cancer	UK Biobank	3.32 (1.10, 10.01)	0.0329058		0.79 (0.29, 2.16)	0.643127
	Pancreatic cancer	FinnGen	1.56 (0.66, 3.70)	0.307505		0.79 (0.32, 1.98)	0.617414
	Pancreatic cancer	Meta-analysis	2.08 (1.06, 4.10)	0.0342938		0.79 (0.40, 1.56)	0.495687
	Acute appendicitis	UK Biobank	1.22 (0.69, 2.16)	0.499268		0.68 (0.40, 1.15)	0.154063
	Acute appendicitis	FinnGen	1.14 (0.89, 1.45)	0.296831		0.79 (0.61, 1.02)	0.0706553
	Acute appendicitis	Meta-analysis	1.15 (0.92, 1.44)	0.221024		0.77 (0.61, 0.97)	0.0244363
	OR, odd ratio; CI, condifence interval; IVW, inverse variance weighted; MR, Mendelian randomization; MR-PRESSO, Mendelian Randomization Pleiotropy RESidual Sum and Outlier; GERA, Genetic Epidemiology Research on Aging; IIBDGC, The International Inflammatory Bowel Disease Genetics Consortium
	*ORs for gatrointestinal diseases were scaled to genetically predicted per 1 standard deviation increase log odds of ever smoked regularly or per 1 standard deviation increase in alcoholic comsumption. Estimates with P<0.05 are reported in bold.

## Sheet: I
	Supplementary file 1I. Association of genetically-predicted alcohol consumption with gastrointestinal disease in univariable Mendelian randomization*
	Disease	Source	Number of used SNPs	IVW			Weighted median		MR-Egger			MR-PRESSO†
				Cochran's Q P value	OR (95%CI)	P value	OR (95%CI)	P value	OR (95%CI)	P value	P intercept	Outliers	OR (95%CI)	P value
	Gastroesophageal reflux	UK Biobank	80	0.00164764	0.85 (0.63, 1.14)	0.274377	0.78 (0.49, 1.23)	0.281793	0.87 (0.49, 1.54)	0.62984	0.9248	NA	NA	NA
	Gastroesophageal reflux	FinnGen	78	0.00713337	1.12 (0.85, 1.48)	0.408419	1.36 (0.95, 1.94)	0.0927214	1.12 (0.57, 2.22)	0.73714	0.996855	NA	NA	NA
	Gastroesophageal reflux	Meta-analysis	-	-	0.99 (0.81, 1.21)	0.892939	1.10 (0.83, 1.46)	0.505947	0.97 (0.62, 1.50)	0.87892	NA	NA	NA	NA
	Esophageal cancer	UK Biobank	80	0.273995	4.10 (1.39, 12.09)	0.0105108	8.93 (1.60, 50.01)	0.0127032	2.32 (0.29, 18.64)	0.431057	0.53205	NA	NA	NA
	Esophageal cancer	FinnGen	78	0.470803	1.38 (0.30, 6.39)	0.679457	1.46 (0.13, 16.60)	0.758955	0.52 (0.01, 23.39)	0.737129	0.58378	NA	NA	NA
	Esophageal cancer	Meta-analysis	-	-	2.86 (1.18, 6.91)	0.0198664	4.88 (1.20, 19.88)	0.0270817	1.64 (0.26, 10.22)	0.594374	NA	NA	NA	NA
	Gastric ulcer	UK Biobank	80	0.384631	1.04 (0.67, 1.63)	0.857605	1.34 (0.62, 2.89)	0.456404	1.11 (0.47, 2.65)	0.813463	0.866315	NA	NA	NA
	Gastric ulcer	FinnGen	78	0.81366	1.60 (1.04, 2.45)	0.0333514	1.79 (0.85, 3.77)	0.125146	0.71 (0.22, 2.23)	0.55403	0.131864	NA	NA	NA
	Gastric ulcer	Meta-analysis	-	-	1.30 (0.95, 1.77)	0.0976815	1.56 (0.91, 2.66)	0.105173	0.94 (0.47, 1.88)	0.86507	NA	NA	NA	NA
	Duodenal ulcer	UK Biobank	80	0.16715	1.65 (0.95, 2.86)	0.0769204	0.92 (0.39, 2.16)	0.843496	0.96 (0.33, 2.82)	0.946623	0.258134	NA	NA	NA
	Duodenal ulcer	FinnGen	78	0.000853993	2.58 (1.20, 5.53)	0.0148925	2.08 (0.79, 5.52)	0.139859	8.00 (1.11, 57.62)	0.042288	0.226828	NA	NA	NA
	Duodenal ulcer	Meta-analysis	-	-	1.92 (1.23, 3.00)	0.00422753	1.31 (0.69, 2.49)	0.409043	1.56 (0.61, 4.01)	0.35361	NA	NA	NA	NA
	Acute gastritis	UK Biobank	80	0.650104	1.29 (0.59, 2.83)	0.522057	0.65 (0.16, 2.66)	0.552725	0.90 (0.19, 4.30)	0.891659	0.595333	NA	NA	NA
	Acute gastritis	FinnGen	78	0.329318	0.78 (0.37, 1.63)	0.500119	0.72 (0.23, 2.19)	0.559665	0.75 (0.12, 4.71)	0.760007	0.969761	NA	NA	NA
	Acute gastritis	Meta-analysis	-	-	0.99 (0.58, 1.69)	0.960354	0.69 (0.29, 1.66)	0.408775	0.83 (0.25, 2.74)	0.761961	NA	NA	NA	NA
	Chronic gastritis	UK Biobank	80	0.425163	6.03 (1.38, 26.24)	0.0167326	1.55 (0.15, 15.59)	0.708609	1.41 (0.08, 25.04)	0.81645	0.253191	NA	NA	NA
	Chronic gastritis	FinnGen	78	0.112196	1.19 (0.80, 1.77)	0.393064	1.65 (0.93, 2.91)	0.0846745	2.24 (0.85, 5.92)	0.108553	0.167084	NA	NA	NA
	Chronic gastritis	Meta-analysis	-	-	1.33 (0.90, 1.95)	0.14744	1.64 (0.95, 2.86)	0.0778143	2.13 (0.85, 5.36)	0.10675	NA	NA	NA	NA
	Gastric cancer	UK Biobank	80	0.682161	2.08 (0.67, 6.45)	0.203014	2.05 (0.24, 17.37)	0.512191	1.76 (0.18, 17.10)	0.625809	0.866979	NA	NA	NA
	Gastric cancer	FinnGen	78	0.32631	1.27 (0.47, 3.40)	0.637208	1.68 (0.41, 6.99)	0.473201	1.64 (0.14, 18.98)	0.692535	0.821451	NA	NA	NA
	Gastric cancer	Meta-analysis	-	-	1.57 (0.75, 3.30)	0.233193	1.79 (0.55, 5.85)	0.336925	1.71 (0.32, 9.02)	0.529443	NA	NA	NA	NA
	Irritable bowel syndrome	UK Biobank	80	0.0705125	0.88 (0.57, 1.34)	0.538161	0.96 (0.49, 1.90)	0.915174	0.59 (0.26, 1.34)	0.213527	0.277799	NA	NA	NA
	Irritable bowel syndrome	FinnGen	78	0.669826	0.73 (0.51, 1.04)	0.084859	0.76 (0.41, 1.40)	0.375614	1.20 (0.48, 3.03)	0.695053	0.247773	NA	NA	NA
	Irritable bowel syndrome	GERA	79	0.346367	0.50 (0.28, 0.90)	0.0218438	0.37 (0.15, 0.94)	0.0359721	0.26 (0.05, 1.38)	0.118283	0.413068	NA	NA	NA
	Irritable bowel syndrome	Meta-analysis	-	-	0.73 (0.57, 0.93)	0.0118193	0.72 (0.48, 1.08)	0.113525	0.71 (0.40, 1.26)	0.239017	NA	NA	NA	NA
	Celiac disease	UK Biobank	80	0.25745	0.61 (0.31, 1.18)	0.142682	0.59 (0.17, 2.02)	0.401074	1.58 (0.45, 5.57)	0.478446	0.782002	NA	NA	NA
	Celiac disease	FinnGen	78	0.373805	0.76 (0.42, 1.37)	0.358917	1.21 (0.49, 2.96)	0.682521	1.25 (0.29, 5.41)	0.769218	0.470974	NA	NA	NA
	Celiac disease	Meta-analysis	-	-	0.69 (0.44, 1.07)	0.0969895	0.95 (0.47, 1.93)	0.88766	1.43 (0.55, 3.72)	0.464077	NA	NA	NA	NA
	Diverticular disease	UK Biobank	80	1.99282e-10	1.15 (0.87, 1.52)	0.333159	1.09 (0.78, 1.51)	0.616553	1.13 (0.66, 1.94)	0.664171	0.94077	1	1.12 (0.86, 1.47)	0.387729
	Diverticular disease	FinnGen	78	0.277456	0.83 (0.66, 1.05)	0.11585	0.78 (0.55, 1.10)	0.162267	0.71 (0.40, 1.26)	0.243134	0.554859	NA	NA	NA
	Diverticular disease	Meta-analysis	-	-	0.95 (0.79, 1.13)	0.553111	0.93 (0.73, 1.18)	0.548491	0.91 (0.61, 1.34)	0.624369	NA	NA	NA	NA
	Crohn's disease	UK Biobank	80	0.393922	0.98 (0.50, 1.93)	0.952991	0.58 (0.18, 1.86)	0.360548	0.58 (0.16, 2.15)	0.419819	0.363679	NA	NA	NA
	Crohn's disease	FinnGen	78	0.137006	1.09 (0.60, 2.00)	0.768518	1.19 (0.48, 2.93)	0.70134	0.52 (0.12, 2.27)	0.383836	0.279731	NA	NA	NA
	Crohn's disease	IIBDGC	82	8.09751e-18	0.66 (0.33, 1.31)	0.230978	0.98 (0.54, 1.79)	0.947541	0.82 (0.27, 2.46)	0.719868	0.622781	5	0.66 (0.39, 1.11)	0.119218
	Crohn's disease	Meta-analysis	-	-	0.91 (0.62, 1.32)	0.612534	0.95 (0.60, 1.51)	0.829418	0.66 (0.32, 1.37)	0.260088	NA	NA	NA	NA
	Ulcerative colitis	UK Biobank	80	0.00270613	0.98 (0.53, 1.79)	0.937416	0.97 (0.39, 2.40)	0.944563	0.76 (0.23, 2.48)	0.651441	0.63039	NA	NA	NA
	Ulcerative colitis	FinnGen	78	0.00432994	1.31 (0.82, 2.09)	0.258859	1.54 (0.83, 2.85)	0.168902	0.59 (0.19, 1.87)	0.377366	0.144887	NA	NA	NA
	Ulcerative colitis	IIBDGC	82	4.57621e-06	0.99 (0.59, 1.66)	0.960274	0.99 (0.51, 1.92)	0.98283	1.02 (0.43, 2.45)	0.960722	0.922001	3	0.90 (0.58, 1.40)	0.641212
	Ulcerative colitis	Meta-analysis	-	-	1.11 (0.82, 1.50)	0.508787	1.19 (0.80, 1.78)	0.391069	0.82 (0.45, 1.49)	0.508945	NA	NA	NA	NA
	Colorectal cancer	UK Biobank	80	0.00959079	1.34 (0.82, 2.20)	0.2463	1.08 (0.52, 2.24)	0.845838	1.17 (0.44, 3.06)	0.755901	0.739363	NA	NA	NA
	Colorectal cancer	FinnGen	78	0.0364838	0.87 (0.52, 1.45)	0.590216	0.92 (0.45, 1.89)	0.817988	1.35 (0.38, 4.74)	0.645713	0.459338	NA	NA	NA
	Colorectal cancer	Meta-analysis	-	-	1.09 (0.76, 1.55)	0.649303	0.99 (0.59, 1.66)	0.9783	1.23 (0.57, 2.64)	0.597318	NA	NA	NA	NA
	Non-alcoholic fatty liver disease	UK Biobank	80	0.000350418	1.17 (0.49, 2.80)	0.726867	3.43 (1.19, 9.88)	0.0224893	1.44 (0.26, 7.85)	0.677651	0.782002	3	1.78 (0.82, 3.84)	0.147612
	Non-alcoholic fatty liver disease	FinnGen	78	0.00558005	1.24 (0.48, 3.18)	0.652365	1.49 (0.41, 5.34)	0.541867	2.17 (0.21, 22.37)	0.518079	0.610387	1	1.62 (0.72, 3.68)	0.249103
	Non-alcoholic fatty liver disease	Meta-analysis	-	-	1.20 (0.63, 2.28)	0.573774	2.44 (1.08, 5.51)	0.0318602	1.66 (0.42, 6.54)	0.471855	NA	NA	NA	NA
	Alcoholic liver disease	UK Biobank	80	0.476959	62.47 (23.00, 169.70)	5.06657e-16	284.82 (59.86, 1355.32)	1.23486e-12	352.92 (47.25, 2635.96)	1.89448e-07	0.0554107	NA	NA	NA
	Alcoholic liver disease	FinnGen	78	0.00834409	5.59 (2.51, 12.44)	2.50326e-05	4.32 (1.41, 13.23)	0.0104644	8.88 (1.21, 65.07)	0.034859	0.62018	NA	NA	NA
	Alcoholic liver disease	Meta-analysis	-	-	14.35 (7.69, 26.81)	6.32019e-17	17.95 (7.23, 44.58)	4.93649e-10	55.01 (13.36, 226.48)	2.84618e-08	NA	NA	NA	NA
	Cirrhosis	UK Biobank	80	0.0809294	1.16 (0.06, 20.81)	0.919057	2.90 (0.03, 332.48)	0.660433	1.13 (0.00, 314.58)	0.965814	0.99154	NA	NA	NA
	Cirrhosis	FinnGen	78	0.00208182	3.13 (1.55, 6.30)	0.00140509	5.04 (2.02, 12.56)	0.000525745	3.57 (0.63, 20.37)	0.156085	0.871138	1	3.83 (2.10, 6.98)	3.56526e-05
	Cirrhosis	Meta-analysis	-	-	2.96 (1.50, 5.85)	0.00176262	4.94 (2.01, 12.11)	0.000487042	3.23 (0.61, 17.05)	0.167202	NA	NA	NA	NA
	Liver cancer	UK Biobank	80	0.371791	1.76 (0.38, 8.11)	0.467678	1.81 (0.11, 30.86)	0.682881	0.36 (0.02, 6.75)	0.495362	0.217552	NA	NA	NA
	Liver cancer	FinnGen	78	0.687044	0.85 (0.23, 3.12)	0.80922	0.60 (0.07, 5.24)	0.643781	3.27 (0.12, 89.62)	0.48499	0.385409	NA	NA	NA
	Liver cancer	Meta-analysis	-	-	1.16 (0.43, 3.11)	0.774723	0.90 (0.16, 5.04)	0.904758	0.95 (0.11, 8.53)	0.962552	NA	NA	NA	NA
	Cholangitis	UK Biobank	80	0.437095	1.20 (0.33, 4.33)	0.779409	9.52 (1.37, 66.37)	0.0229023	5.87 (0.51, 68.21)	0.161254	0.142083	NA	NA	NA
	Cholangitis	FinnGen	78	0.0763499	0.84 (0.31, 2.23)	0.723562	1.04 (0.25, 4.38)	0.959234	0.13 (0.01, 1.36)	0.0919736	0.0914708	NA	NA	NA
	Cholangitis	Meta-analysis	-	-	0.96 (0.44, 2.08)	0.911718	2.28 (0.72, 7.25)	0.162606	0.81 (0.15, 4.45)	0.807616	NA	NA	NA	NA
	Cholecystitis	UK Biobank	80	0.319401	0.83 (0.48, 1.44)	0.502044	1.71 (0.69, 4.25)	0.24921	1.20 (0.41, 3.52)	0.736819	0.428181	NA	NA	NA
	Cholecystitis	FinnGen	78	0.286011	2.36 (1.32, 4.22)	0.00383656	3.55 (1.53, 8.25)	0.00323319	0.94 (0.23, 3.91)	0.930641	0.170241	NA	NA	NA
	Cholecystitis	Meta-analysis	-	-	1.36 (0.91, 2.03)	0.132205	2.53 (1.36, 4.70)	0.00324237	1.10 (0.47, 2.59)	0.828339	NA	NA	NA	NA
	Cholelithiasis	UK Biobank	80	7.98256e-21	1.08 (0.69, 1.69)	0.732143	0.79 (0.50, 1.26)	0.324025	0.92 (0.39, 2.19)	0.84782	0.667956	5	0.92 (0.67, 1.27)	0.623069
	Cholelithiasis	FinnGen	78	1.69496e-36	0.98 (0.64, 1.49)	0.910903	0.95 (0.67, 1.33)	0.762126	0.75 (0.27, 2.13)	0.596965	0.596579	6	0.86 (0.65, 1.13)	0.285019
	Cholelithiasis	Meta-analysis	-	-	1.02 (0.75, 1.39)	0.87847	0.89 (0.68, 1.17)	0.406356	0.85 (0.44, 1.65)	0.625369	NA	NA	NA	NA
	Acute pancreatitis	UK Biobank	80	0.108072	0.72 (0.36, 1.44)	0.354502	0.42 (0.14, 1.26)	0.121845	0.76 (0.20, 2.88)	0.683887	0.937632	NA	NA	NA
	Acute pancreatitis	FinnGen	78	0.201569	1.88 (1.15, 3.06)	0.0114775	2.58 (1.30, 5.11)	0.00683203	2.95 (0.87, 9.97)	0.085617	0.429424	NA	NA	NA
	Acute pancreatitis	Meta-analysis	-	-	1.36 (0.91, 2.03)	0.127914	1.55 (0.87, 2.77)	0.140837	1.59 (0.65, 3.91)	0.311718	NA	NA	NA	NA
	Chronic pancreatitis	UK Biobank	80	0.100951	2.75 (0.71, 10.62)	0.140929	3.60 (0.33, 38.88)	0.290799	16.72 (1.26, 221.90)	0.0358787	0.114371	NA	NA	NA
	Chronic pancreatitis	FinnGen	78	0.906028	3.00 (1.75, 5.14)	6.6325e-05	4.16 (1.70, 10.16)	0.00179808	2.69 (0.60, 12.16)	0.201324	0.879464	NA	NA	NA
	Chronic pancreatitis	Meta-analysis	-	-	2.96 (1.80, 4.89)	2.132e-05	4.08 (1.77, 9.43)	0.00098855	4.28 (1.16, 15.74)	0.0286057	NA	NA	NA	NA
	Pancreatic cancer	UK Biobank	80	0.891118	1.25 (0.45, 3.50)	0.669672	1.00 (0.12, 8.04)	0.999206	0.47 (0.05, 4.31)	0.507854	0.315891	NA	NA	NA
	Pancreatic cancer	FinnGen	78	0.628519	0.36 (0.14, 0.92)	0.0327036	0.34 (0.08, 1.56)	0.165978	0.84 (0.08, 8.95)	0.886316	0.450719	NA	NA	NA
	Pancreatic cancer	Meta-analysis	-	-	0.63 (0.32, 1.26)	0.193133	0.50 (0.15, 1.69)	0.262139	0.62 (0.12, 3.11)	0.559254	NA	NA	NA	NA
	Acute appendicitis	UK Biobank	80	0.498318	0.95 (0.55, 1.65)	0.86563	0.66 (0.24, 1.80)	0.421365	0.57 (0.20, 1.64)	0.297821	0.265127	NA	NA	NA
	Acute appendicitis	FinnGen	78	0.00298294	0.77 (0.59, 1.00)	0.0475087	0.70 (0.49, 1.01)	0.0547558	0.37 (0.20, 0.69)	0.00242495	0.0138592	NA	NA	NA
	Acute appendicitis	Meta-analysis	-	-	0.80 (0.63, 1.01)	0.0626319	0.70 (0.49, 0.98)	0.0375301	0.41 (0.24, 0.71)	0.00119423	NA	NA	NA	NA
	OR, odd ratio; CI, condifence interval; IVW, inverse variance weighted; MR, Mendelian randomization; MR-PRESSO, Mendelian Randomization Pleiotropy RESidual Sum and Outlier; GERA, Genetic Epidemiology Research on Aging; IIBDGC, The International Inflammatory Bowel Disease Genetics Consortium*
	*ORs for gatrointestinal diseases were scaled to genetically predicted per SD increase of log-transformed alcoholic drinks per week. Estimates with P<0.05 in IVW analysis are reported in bold.
	†Outlier-corrected estimate. NA, not available (if no outliers were detected).

[truncated: 5 more sheets: J, K, L, M, N]
